# Supplementary material for: Accounting For Alignment Uncertainty in Phylogenomics
Source: PLoS One. 2012 Jan 17;7(1):e30288. doi: 10.1371/journal.pone.0030288 (PMC3260272; doi:10.1371/journal.pone.0030288)
Supplement: File S1 — This file contains all the control files used by ROSE to simulate protein sequence evolution for the ten marker genes. (DOC) [file pone.0030288.s002.doc]

# This is the rose control file for dnaG 
SequenceLen = 606
SequenceNum = 100
OutputFilebase = "dnaG"
InputType = 20 /* PROTEIN */
TheAlphabet = "ARNDCQEGHILKMFPSTWYV"
TheFreq = [0.0781700168890949,0.0628208100142398,0.0465774745835679,0.0593767592807233,0.0108951220319899,0.0419081365698579,0.0757028843924893,0.0611153425837004,0.0195218068020002,0.0645925091896546,0.106219160843792,0.073500678875385,0.0182468457131503,0.0492598602510183,0.0377024207702752,0.0612643640096698,0.0388283604331556,0.00589462529390337,0.0355664469980462,0.0528363744742855]
TheTree = (((((((((((((((((n0:33,n1:33):14,n2:37):51,(n3:34,n4:42):4):3,n5:38):2,((n6:38,n7:41):6,n8:48):3):2,(n9:42,n10:34):2):6,(n11:46,n12:35):17):22,((((((n13:39,n14:42):2,n15:40):3,n16:42):3,n17:43):10,(((n18:43,n19:32):19,((n20:39,n21:47):15,n22:76):18):7,n23:60):6):9,n24:37):6):10,((((((n25:40,n26:55):5,n27:40):4,n28:36):4,n29:42):3,(((n30:37,n31:35):7,n32:35):7,n33:53):5):4,n34:55):3):3,n35:57):3,((((n36:34,n37:33):2,n38:42):49,n39:54):5,n40:73):3):2,((((((n41:41,n42:79):6,n43:37):4,n44:41):21,n45:52):6,n46:64):16,((((n47:43,n48:49):6,n49:47):11,n50:75):8,(n51:36,n52:36):39):5):4):2,(((n53:54,n54:55):17,n55:57):6,n56:61):11):3,((((((n57:48,(((n58:39,n59:30):5,n60:42):3,n61:36):5):28,((n62:49,n63:40):6,(n64:32,n65:48):15):26):7,n66:49):12,n67:68):13,n68:65):10,(((((n69:37,n70:37):3,n71:33):2,(n72:36,n73:34):3):2,(((n74:46,n75:38):8,n76:35):52,(((n77:34,n78:36):4,n79:53):4,n80:33):6):2):7,(((((((((n81:31,n82:51):2,n83:36):6,n84:39):4,n85:37):4,n86:52):13,n87:48):9,n88:54):4,(n89:42,n90:39):12):9,(((n91:36,n92:37):6,n93:57):9,n94:105):3):4):3):2):4,n95:59):5,(n96:39,n97:38):27):15,(n98:35,n99:34):15);

TheSequence = "MGTDKLKFKEFINKINTEVPIYDLVQENNVILKKVGKNFMGLCPFHSEKNASFSVSPEKNIAVCMSCKKGGRPISFYKEIKKVSFQYAVSELAQRLNIVDLSKKIFLSNSNNHLYRIIEETMIFFQSNLYDRTFGKKAFKYLEEERKIKDETIKYFKLGYALSHLEENIFNNKIKNKKEFNNFSSLVDYLKKNFSINDLIDLGIIKENEKTGDYYNFFNERLIFPITDHYGKFVGFAGRNLNNNEPIKYLFNTNTKLFNKQELLYQFYENKSEIIKKNQVIIYEGFFEVIVSFQCGIKNTVATMGTNLSIKQIKILSELTKEFIFAYDNDFAGQESFFKLGNYLTKEGFRVKRILFPNGQDPDEYYRQKGTIQFQKFIIDNTEDFLDIKCEELSKKINYFSLDTVEKEKIKSELFSLFYKQNEKIKIHYQSILNNKYNIKIKLFFDKNNNIQKSADIYKVKQLMTTNFLLDVIFDRHYLYINWDRLSKDEKFSNFQQKSPDVLSINDLIYYYYVFLFKEIKKYYDSHPQENSITIKNIDDFFKLYPQASCFIIDLKNKIKIKEINNSIYKYKLKMKNEKKENKKKEILNKVLKLQLQLNNFKLYKD"
TheMutationProbability = [0.05106,1.433,1.175,0.952,0.8937,1.557,1.866,1.315,1.537,1.566,0.99,0.5,0.9306,0.99,0.4682,0.99,1.307,0.7132,0.99,0.5403,0.2646,0.3495,0.8221,0.6104,0.3739,0.6448,0.9433,1.078,0.8918,0.4419,2.211,0.1874,0.8961,0.5558,1.038,0.06449,1.298,0.7624,0.99,1.725,0.4582,0.99,0.1453,0.05196,0.05297,0.08527,1.262,0.1236,0.4555,0.2806,0.2088,0.05063,0.1957,0.8579,0.138,0.6643,0.8328,1.369,0.5554,0.7803,0.99,0.838,0.757,0.05499,0.1157,0.3925,0.1519,0.8338,0.99,0.99,0.05286,0.3867,0.5845,0.4724,1.37,0.1709,0.597,0.5667,1.458,1.551,0.6803,0.99,0.8173,0.6292,0.3243,1.873,0.443,0.166,0.5895,0.99,2.092,0.245,0.2277,1.632,0.99,0.9398,0.4627,0.5473,1.543,0.9142,1.427,2.285,3.193,2.064,2.251,3.192,2.046,2.347,2.067,2.69,0.99,1.95,2.16,0.9072,2.191,1.607,0.9666,0.8991,1.39,2.179,0.4245,0.99,2.134,1.341,0.7901,1.409,2.07,2.072,0.2193,3.323,1.57,1.472,2.084,1.619,0.9131,1.936,2.45,0.3345,0.9538,1.931,0.1819,0.4052,1.499,2.015,1.016,0.05068,0.7101,0.9501,0.8804,2.315,1.417,0.99,0.8295,1.554,2.071,0.3475,1.323,0.6445,0.05287,0.7894,0.3416,0.5595,1.717,0.8771,1.708,1.436,0.5113,1.32,0.4902,1,1,1,1,1,1,1.078,1.369,1.549,1.472,1.65,0.9028,1.268,1.886,1.436,1.928,0.5729,3.352,1.897,2.442,0.8875,1.839,1.732,0.998,1.639,0.99,3.473,1.81,3.123,0.8996,2.8,1.723,0.7763,0.2283,0.4299,1.349,1.877,2.045,1.281,1.409,1.562,1.359,0.9832,1.501,3.418,0.99,0.2943,1.016,0.1724,0.6654,0.7931,0.05108,0.596,0.4909,0.2986,0.07226,0.1525,1.733,0.5005,3.311,1.746,0.2704,0.99,0.709,0.3741,0.44,0.1343,0.2397,0.2832,0.05068,0.99,0.8161,1.242,0.8468,1.655,2.389,2.653,0.6317,0.05076,0.05173,0.6948,0.05065,0.1859,0.448,0.3035,0.3073,1.696,0.9751,0.1947,0.99,0.05076,0.791,1.665,0.99,0.1855,0.5055,0.4036,0.8771,0.99,1.683,0.2813,0.8987,1.577,1.342,0.6441,0.9199,0.99,2.502,1.262,1.775,0.7268,0.6909,0.4369,0.3511,0.05073,0.05144,0.3334,0.4624,0.05076,0.2623,0.3123,0.6767,0.7728,0.6679,0.6101,0.99,0.2266,0.5769,1.774,0.4398,0.3707,0.1412,0.1017,0.6501,0.3252,0.05144,0.0539,0.304,0.6365,0.2109,1.654,1.703,0.3823,0.99,1.336,0.99,0.495,0.99,0.4941,1.943,0.7774,1.912,1.393,0.6268,0.8468,0.99,1.302,0.6949,0.05067,0.6595,0.05067,1.83,0.05617,0.05144,0.99,0.99,0.07729,0.3996,2.053,0.4362,0.6162,0.99,1.534,1.537,1.059,1.882,1.869,1.918,1.307,1.413,1.678,0.7925,1.412,0.5116,0.8477,1.687,0.6069,0.7015,1.751,0.5186,1.216,0.05067,0.153,0.1538,0.5832,0.99,0.9758,0.99,1.449,1.45,0.5484,2.148,0.99,1.003,0.7443,1.868,1.719,1.874,1.014,1.072,1.483,1.935,0.5562,2.723,1.321,1.645,0.99,0.99,0.99,1.601,0.99,1.628,2.184,1.783,1.915,2.141,1.581,2.792,1.295,1.566,2.207,1.596,1.779,1.023,1.472,0.99,1.599,0.8922,1.116,1.617,0.9346,1.316,1.632,1.559,1.047,2.669,1.587,1.65,0.9687,1.438,2.992,1.715,0.9016,2.109,1.698,1.769,0.8905,2.018,2.541,1.368,1.672,1.73,1.793,0.99,0.6388,1.844,1.482,1.588,1.267,1.271,1.401,1.055,1.702,1.828,1.023,3.257,1.827,1.756,3.457,2.466,1.926,1.622,1.921,2.177,3.348,2.979,3.46,1.531,1.725,3.124,3.082,2.345,2.968,0.99,0.7761,2.071,2.305,1.442,1.446,1.092,1.116,1.534,3.437,1.484,3.433,1.79,3.323,1.93,1.615,2.268,1.807,1.435,1.468,1.965,2.262,1.592,1.861,2.316,1.911,2.447,2.118,3.178,1.173,2.448,1.187,2.029,2.104,2.855,1.659,1.626,1.772,1.64,2.303,3.476,2.789,2.517,1.85,2.735,3.097,3.213,2.183,2.905,3.126,2.392,2.312,3.099,1.355,1.735,2.207,2.374,0.99,2.162,1.799,3.126,3.422,2.637,1.275,2.327,2.348,3.03,1.368,2.906,1.045,1.52,2.599,2.541,2.725,2.142,2.239,1.804,1.849,3.136,2.219,1.986,1.453,1.355,1.669,2.087,2.146,1.783,2.287,1.439,2.248,2.2,3.285,2.172,1.315,2.994,2.365,0.854,1.238,1.776,2.777,2.558,1.601,1.77,3.414,1.608,2.017,1.822,2.582,0.9045,1.549,2.033,1.624,1.328,2.309,1.817,1.685,3.239,3.138,3.103,1.606,2.956,3.351,2.208,2.133,0.8373,2.251,1.926,1.188,1.299,2.208,2.459,0.8566,1.424,1.26,2.318,1.865,1.758,2.847,2.003,2.489,2.513,3.063,2.369,2.84]

TheInsertThreshold = 0.001
TheDeleteThreshold = 0.001
TheInsFunc = [.4,.3,.1,.01,.01,.01,.01]
TheDelFunc = [.4,.3,.1,.01,.01,.01,.01]

ThePAMMatrix = [[9867.0,   2.0,   9.0,  10.0,   3.0,   8.0,  17.0,  21.0,   2.0,   6.0,   4.0,   2.0,   6.0,   2.0,  22.0,  35.0,  32.0,   0.0,   2.0,  18.0],
                [   1.0,9913.0,   1.0,   0.0,   1.0,  10.0,   0.0,   0.0,  10.0,   3.0,   1.0,  19.0,   4.0,   1.0,   4.0,   6.0,   1.0,   8.0,   0.0,   1.0],
                [   4.0,   1.0,9822.0,  36.0,   0.0,   4.0,   6.0,   6.0,  21.0,   3.0,   1.0,  13.0,   0.0,   1.0,   2.0,  20.0,   9.0,   1.0,   4.0,   1.0],
                [   6.0,   0.0,  42.0,9859.0,   0.0,   6.0,  53.0,   6.0,   4.0,   1.0,   0.0,   3.0,   0.0,   0.0,   1.0,   5.0,   3.0,   0.0,   0.0,   1.0],
                [   1.0,   1.0,   0.0,   0.0,9973.0,   0.0,   0.0,   0.0,   1.0,   1.0,   0.0,   0.0,   0.0,   0.0,   1.0,   5.0,   1.0,   0.0,   3.0,   2.0],
                [   3.0,   9.0,   4.0,   5.0,   0.0,9876.0,  27.0,   1.0,  23.0,   1.0,   3.0,   6.0,   4.0,   0.0,   6.0,   2.0,   2.0,   0.0,   0.0,   1.0],
                [  10.0,   0.0,   7.0,  56.0,   0.0,  35.0,9865.0,   4.0,   2.0,   3.0,   1.0,   4.0,   1.0,   0.0,   3.0,   4.0,   2.0,   0.0,   1.0,   2.0],
                [  21.0,   1.0,  12.0,  11.0,   1.0,   3.0,   7.0,9935.0,   1.0,   0.0,   1.0,   2.0,   1.0,   1.0,   3.0,  21.0,   3.0,   0.0,   0.0,   5.0],
                [   1.0,   8.0,  18.0,   3.0,   1.0,  20.0,   1.0,   0.0,9912.0,   0.0,   1.0,   1.0,   0.0,   2.0,   3.0,   1.0,   1.0,   1.0,   4.0,   1.0],
                [   2.0,   2.0,   3.0,   1.0,   2.0,   1.0,   2.0,   0.0,   0.0,9872.0,   9.0,   2.0,  12.0,   7.0,   0.0,   1.0,   7.0,   0.0,   1.0,  33.0],
                [   3.0,   1.0,   3.0,   0.0,   0.0,   6.0,   1.0,   1.0,   4.0,  22.0,9947.0,   2.0,  45.0,  13.0,   3.0,   1.0,   3.0,   4.0,   2.0,  15.0],
                [   2.0,  37.0,  25.0,   6.0,   0.0,  12.0,   7.0,   2.0,   2.0,   4.0,   1.0,9926.0,  20.0,   0.0,   3.0,   8.0,  11.0,   0.0,   1.0,   1.0],
                [   1.0,   1.0,   0.0,   0.0,   0.0,   2.0,   0.0,   0.0,   0.0,   5.0,   8.0,   4.0,9874.0,   1.0,   0.0,   1.0,   2.0,   0.0,   0.0,   4.0],
                [   1.0,   1.0,   1.0,   0.0,   0.0,   0.0,   0.0,   1.0,   2.0,   8.0,   6.0,   0.0,   4.0,9946.0,   0.0,   2.0,   1.0,   3.0,  28.0,   0.0],
                [  13.0,   5.0,   2.0,   1.0,   1.0,   8.0,   3.0,   2.0,   5.0,   1.0,   2.0,   2.0,   1.0,   1.0,9926.0,  12.0,   4.0,   0.0,   0.0,   2.0],
                [  28.0,  11.0,  34.0,   7.0,  11.0,   4.0,   6.0,  16.0,   2.0,   2.0,   1.0,   7.0,   4.0,   3.0,  17.0,9840.0,  38.0,   5.0,   2.0,   2.0],
                [  22.0,   2.0,  13.0,   4.0,   1.0,   3.0,   2.0,   2.0,   1.0,  11.0,   2.0,   8.0,   6.0,   1.0,   5.0,  32.0,9871.0,   0.0,   2.0,   9.0],
                [   0.0,   2.0,   0.0,   0.0,   0.0,   0.0,   0.0,   0.0,   0.0,   0.0,   0.0,   0.0,   0.0,   1.0,   0.0,   1.0,   0.0,9976.0,   1.0,   0.0],
                [   1.0,   0.0,   3.0,   0.0,   3.0,   0.0,   1.0,   0.0,   4.0,   1.0,   1.0,   0.0,   0.0,  21.0,   0.0,   1.0,   1.0,   2.0,9945.0,   1.0],
                [  13.0,   2.0,   1.0,   1.0,   3.0,   2.0,   2.0,   3.0,   3.0,  57.0,  11.0,   1.0,  17.0,   1.0,   3.0,   2.0,  10.0,   0.0,   2.0,9901.0]]


# This is the rose control file for frr 
SequenceLen = 185
SequenceNum = 100
OutputFilebase = "frr"
InputType = 20 /* PROTEIN */
TheAlphabet = "ARNDCQEGHILKMFPSTWYV"
TheFreq = [0.0765359155314842,0.0654302751791673,0.045954373871656,0.0706274960336999,0.00202418075387056,0.0388970950270803,0.0992942721155424,0.0380217736200011,0.0110509327643744,0.0888998304064774,0.0859456206575852,0.100771376989989,0.0300344657804037,0.013567481809727,0.0361617156299579,0.0546528803545052,0.0510421795503036,0.00377482356802889,0.0178346736692379,0.0694786366869085]
TheTree = (((((((((((((((((n0:22,n1:22):9,n2:25):34,(n3:23,n4:28):3):2,n5:26):1,((n6:25,n7:27):4,n8:32):2):1,(n9:28,n10:23):1):4,(n11:31,n12:23):11):15,((((((n13:26,n14:28):1,n15:27):2,n16:28):2,n17:29):7,(((n18:29,n19:21):13,((n20:26,n21:32):10,n22:51):12):4,n23:40):4):6,n24:25):4):6,((((((n25:27,n26:37):3,n27:27):3,n28:24):2,n29:28):2,(((n30:25,n31:24):5,n32:23):4,n33:36):3):3,n34:37):2):2,n35:38):2,((((n36:23,n37:22):1,n38:28):33,n39:36):3,n40:49):2):1,((((((n41:28,n42:53):4,n43:25):3,n44:27):14,n45:34):4,n46:43):10,((((n47:29,n48:33):4,n49:31):7,n50:50):5,(n51:24,n52:24):26):3):3):1,(((n53:36,n54:37):11,n55:38):4,n56:41):7):2,((((((n57:32,(((n58:26,n59:20):3,n60:28):2,n61:24):3):19,((n62:33,n63:27):4,(n64:22,n65:32):10):17):4,n66:33):8,n67:45):9,n68:44):6,(((((n69:25,n70:24):2,n71:22):1,(n72:24,n73:23):2):1,(((n74:31,n75:26):5,n76:23):35,(((n77:23,n78:24):2,n79:36):2,n80:22):4):1):5,(((((((((n81:21,n82:34):1,n83:24):4,n84:26):3,n85:25):2,n86:35):8,n87:32):6,n88:36):2,(n89:28,n90:26):8):6,(((n91:24,n92:25):4,n93:38):6,n94:71):2):2):2):1):2,n95:39):4,(n96:26,n97:25):18):10,(n98:24,n99:23):10);

TheSequence = "MVEELLLEVEEKMEKTLESTKVRFSHVRAGRANVSMVDGVLVDYYGQMSPLNQVGSVTAPEARLLVIDPWDKSLIPAIEKAILAANIGFNPSNDGRIIRLVVPELTEDRRKEYVKVVKKEAEEGKVAARNIRKDYNNKVRKMEKDSEITEDDLKHVEEKIQKLTDECIKHIDELLAKKEKELLSI"
TheMutationProbability = [0.08987,2.724,2.03,2.999,1.203,3.098,3.095,2.016,1.482,1.788,1.983,1.664,0.2524,3.069,0.7528,0.99,1.607,2.142,2.633,1.661,2.114,2.396,1.46,1.447,2.005,1.432,0.99,0.272,0.5208,0.3437,0.3604,0.3372,0.7582,1.369,0.99,1.323,0.57,0.8779,2.135,0.5859,3.05,0.3862,0.99,0.8471,0.2185,0.3508,1.786,2.902,0.7764,0.5418,0.99,0.99,0.4582,0.99,0.4435,0.99,0.8425,0.99,0.9486,0.99,0.6981,0.99,0.7168,0.99,0.8045,2.05,0.4867,1.393,0.4148,1.458,0.376,1.694,1.394,2.987,1.329,2.932,2.676,0.3341,0.7768,0.9764,0.2904,0.1885,2.96,2.61,0.5581,0.9061,0.7193,0.5037,1.522,0.8409,0.3274,2.483,0.818,0.5519,0.5702,1.743,1.744,0.4864,0.2305,1.38,2.079,1.338,0.1334,2.068,0.5104,0.2171,0.6777,0.5498,0.4343,0.09164,0.99,0.99,1.558,0.6946,0.3443,3.066,0.933,1.477,1.813,2.052,0.99,0.09284,1.872,1.306,0.7498,0.6363,0.8847,0.99,0.09024,0.3509,0.875,0.09024,0.3207,0.6941,0.99,0.9533,1.487,3.099,1.805,0.5978,1.529,2.509,1.719,0.694,1.675,1.516,2.031,0.9857,0.7378,0.5631,0.09145,1.619,3.095,1.402,2.775,2.3,1.478,1.713,2.001,0.8841,0.2401,0.9337,2.114,0.2471,0.5204,3.037,3.06,0.8815,2.341,2.138,0.99,0.737,3.077,2.807,2.506,2.91,3.049,0.09369,0.2929,1.455,0.5814,0.7196,0.99,1.512,1.087]

TheInsertThreshold = 0.001
TheDeleteThreshold = 0.001
TheInsFunc = [.4,.3,.1,.01,.01,.01,.01]
TheDelFunc = [.4,.3,.1,.01,.01,.01,.01]

ThePAMMatrix = [[9867.0,   2.0,   9.0,  10.0,   3.0,   8.0,  17.0,  21.0,   2.0,   6.0,   4.0,   2.0,   6.0,   2.0,  22.0,  35.0,  32.0,   0.0,   2.0,  18.0],
                [   1.0,9913.0,   1.0,   0.0,   1.0,  10.0,   0.0,   0.0,  10.0,   3.0,   1.0,  19.0,   4.0,   1.0,   4.0,   6.0,   1.0,   8.0,   0.0,   1.0],
                [   4.0,   1.0,9822.0,  36.0,   0.0,   4.0,   6.0,   6.0,  21.0,   3.0,   1.0,  13.0,   0.0,   1.0,   2.0,  20.0,   9.0,   1.0,   4.0,   1.0],
                [   6.0,   0.0,  42.0,9859.0,   0.0,   6.0,  53.0,   6.0,   4.0,   1.0,   0.0,   3.0,   0.0,   0.0,   1.0,   5.0,   3.0,   0.0,   0.0,   1.0],
                [   1.0,   1.0,   0.0,   0.0,9973.0,   0.0,   0.0,   0.0,   1.0,   1.0,   0.0,   0.0,   0.0,   0.0,   1.0,   5.0,   1.0,   0.0,   3.0,   2.0],
                [   3.0,   9.0,   4.0,   5.0,   0.0,9876.0,  27.0,   1.0,  23.0,   1.0,   3.0,   6.0,   4.0,   0.0,   6.0,   2.0,   2.0,   0.0,   0.0,   1.0],
                [  10.0,   0.0,   7.0,  56.0,   0.0,  35.0,9865.0,   4.0,   2.0,   3.0,   1.0,   4.0,   1.0,   0.0,   3.0,   4.0,   2.0,   0.0,   1.0,   2.0],
                [  21.0,   1.0,  12.0,  11.0,   1.0,   3.0,   7.0,9935.0,   1.0,   0.0,   1.0,   2.0,   1.0,   1.0,   3.0,  21.0,   3.0,   0.0,   0.0,   5.0],
                [   1.0,   8.0,  18.0,   3.0,   1.0,  20.0,   1.0,   0.0,9912.0,   0.0,   1.0,   1.0,   0.0,   2.0,   3.0,   1.0,   1.0,   1.0,   4.0,   1.0],
                [   2.0,   2.0,   3.0,   1.0,   2.0,   1.0,   2.0,   0.0,   0.0,9872.0,   9.0,   2.0,  12.0,   7.0,   0.0,   1.0,   7.0,   0.0,   1.0,  33.0],
                [   3.0,   1.0,   3.0,   0.0,   0.0,   6.0,   1.0,   1.0,   4.0,  22.0,9947.0,   2.0,  45.0,  13.0,   3.0,   1.0,   3.0,   4.0,   2.0,  15.0],
                [   2.0,  37.0,  25.0,   6.0,   0.0,  12.0,   7.0,   2.0,   2.0,   4.0,   1.0,9926.0,  20.0,   0.0,   3.0,   8.0,  11.0,   0.0,   1.0,   1.0],
                [   1.0,   1.0,   0.0,   0.0,   0.0,   2.0,   0.0,   0.0,   0.0,   5.0,   8.0,   4.0,9874.0,   1.0,   0.0,   1.0,   2.0,   0.0,   0.0,   4.0],
                [   1.0,   1.0,   1.0,   0.0,   0.0,   0.0,   0.0,   1.0,   2.0,   8.0,   6.0,   0.0,   4.0,9946.0,   0.0,   2.0,   1.0,   3.0,  28.0,   0.0],
                [  13.0,   5.0,   2.0,   1.0,   1.0,   8.0,   3.0,   2.0,   5.0,   1.0,   2.0,   2.0,   1.0,   1.0,9926.0,  12.0,   4.0,   0.0,   0.0,   2.0],
                [  28.0,  11.0,  34.0,   7.0,  11.0,   4.0,   6.0,  16.0,   2.0,   2.0,   1.0,   7.0,   4.0,   3.0,  17.0,9840.0,  38.0,   5.0,   2.0,   2.0],
                [  22.0,   2.0,  13.0,   4.0,   1.0,   3.0,   2.0,   2.0,   1.0,  11.0,   2.0,   8.0,   6.0,   1.0,   5.0,  32.0,9871.0,   0.0,   2.0,   9.0],
                [   0.0,   2.0,   0.0,   0.0,   0.0,   0.0,   0.0,   0.0,   0.0,   0.0,   0.0,   0.0,   0.0,   1.0,   0.0,   1.0,   0.0,9976.0,   1.0,   0.0],
                [   1.0,   0.0,   3.0,   0.0,   3.0,   0.0,   1.0,   0.0,   4.0,   1.0,   1.0,   0.0,   0.0,  21.0,   0.0,   1.0,   1.0,   2.0,9945.0,   1.0],
                [  13.0,   2.0,   1.0,   1.0,   3.0,   2.0,   2.0,   3.0,   3.0,  57.0,  11.0,   1.0,  17.0,   1.0,   3.0,   2.0,  10.0,   0.0,   2.0,9901.0]]


# This is the rose control file for infC 
SequenceLen = 181
SequenceNum = 100
OutputFilebase = "infC"
InputType = 20 /* PROTEIN */
TheAlphabet = "ARNDCQEGHILKMFPSTWYV"
TheFreq = [0.072254179882802,0.0756948551153164,0.0412343422396645,0.0585452395032525,0.00623622385893232,0.0470404816945326,0.0906402881565507,0.0541906349121015,0.0169345734100317,0.0646201817106607,0.0756410945648083,0.123057900112897,0.0342992312241277,0.0322025697543143,0.0437610881135423,0.0355894844363206,0.0330627385624429,0.001451534863717,0.0208590935971184,0.0726842642868663]
TheTree = (((((((((((((((((n0:26,n1:26):11,n2:29):41,(n3:27,n4:33):3):2,n5:30):1,((n6:30,n7:32):5,n8:38):2):1,(n9:33,n10:27):2):4,(n11:37,n12:27):14):17,((((((n13:31,n14:33):2,n15:32):2,n16:33):2,n17:34):8,(((n18:34,n19:25):15,((n20:31,n21:37):12,n22:60):14):5,n23:47):4):7,n24:29):5):8,((((((n25:32,n26:44):4,n27:32):3,n28:29):3,n29:33):3,(((n30:29,n31:28):6,n32:28):5,n33:42):3):3,n34:43):2):2,n35:45):3,((((n36:27,n37:26):2,n38:33):39,n39:42):4,n40:58):3):2,((((((n41:33,n42:62):4,n43:29):3,n44:32):16,n45:41):5,n46:50):12,((((n47:34,n48:39):5,n49:37):9,n50:59):6,(n51:28,n52:29):31):4):3):1,(((n53:43,n54:44):13,n55:45):5,n56:48):9):3,((((((n57:38,(((n58:31,n59:24):4,n60:33):3,n61:28):4):22,((n62:39,n63:31):4,(n64:26,n65:38):11):21):5,n66:39):9,n67:53):10,n68:51):8,(((((n69:29,n70:29):2,n71:26):2,(n72:28,n73:27):2):1,(((n74:36,n75:30):6,n76:27):41,(((n77:27,n78:28):3,n79:42):3,n80:26):5):1):6,(((((((((n81:25,n82:40):1,n83:29):4,n84:30):3,n85:29):3,n86:41):10,n87:38):7,n88:42):3,(n89:33,n90:31):9):7,(((n91:28,n92:30):4,n93:45):7,n94:83):2):3):3):1):3,n95:46):4,(n96:31,n97:30):21):12,(n98:28,n99:27):12);

TheSequence = "MAQNAKHPSKKEQKPLVNEQIAFNQFTLIDENSTNLGIVKMENALKLAQEKQLDLVLIAPNPTKPIVKLLDFGRYTYDLKRKKRQAKKNQTIIQTKEVVVKPTIAKHDLEFRAKQSKNWIEKGHHVKFIVRAFGRVSTRIELIEKVFDDFYQLVKDVVEIQKPLTASSKTMYAALLVPLKR"
TheMutationProbability = [0.05735,3.575,3.518,3.587,3.714,3.71,2.583,2.982,2.737,3.63,2.538,3.207,2.194,3.585,2.128,0.9275,1.095,0.05321,1.646,1.939,0.04055,0.9442,1.117,1.656,0.9247,0.4673,0.2948,0.884,0.6019,1.259,2.232,1.451,0.6169,1.441,0.7872,1.356,0.2071,0.6012,1.156,1.646,1.663,3.737,0.99,0.0365,1.301,3.679,2.165,0.05973,2.485,1.694,2.058,1.403,0.7625,0.03938,0.1234,0.1575,0.5355,0.5783,0.8264,0.8865,1.603,0.5786,2.346,0.3781,0.2146,0.1232,0.7565,0.5958,0.5713,0.7339,0.2203,0.6718,0.471,0.1955,1.312,0.99,0.4483,0.8946,1.361,1.732,0.2927,0.608,2.157,0.99,0.99,0.8622,0.5959,0.5269,0.8266,0.2509,1.363,2.303,1.225,2.144,1.326,0.06297,0.1792,0.6845,0.4168,1.453,0.5935,0.7905,1.33,0.295,0.99,1.973,0.4455,0.03442,1.489,2.015,0.99,0.1384,1.535,0.8589,0.8685,0.9145,1.875,1.524,0.1751,0.3502,2.343,2.357,0.7075,0.9049,0.2921,0.1754,0.2802,0.9544,0.8644,0.8633,0.99,0.2867,0.4601,0.05833,0.03983,0.2734,0.99,0.99,0.4985,1.688,1.073,1.592,0.3196,2.48,2.155,1.532,0.8165,2.495,0.99,0.99,1.652,2.252,1.852,1.186,2.371,0.99,2.309,0.99,2.319,0.9849,0.6007,1.814,2.359,0.6568,1.196,1.491,0.9373,0.6068,0.3301,0.7559,0.9455,0.6742,2.286,0.7135,1.784,1.368,0.99,0.2615,2.022,1.596,2.214]

TheInsertThreshold = 0.001
TheDeleteThreshold = 0.001
TheInsFunc = [.4,.3,.1,.01,.01,.01,.01]
TheDelFunc = [.4,.3,.1,.01,.01,.01,.01]

ThePAMMatrix = [[9867.0,   2.0,   9.0,  10.0,   3.0,   8.0,  17.0,  21.0,   2.0,   6.0,   4.0,   2.0,   6.0,   2.0,  22.0,  35.0,  32.0,   0.0,   2.0,  18.0],
                [   1.0,9913.0,   1.0,   0.0,   1.0,  10.0,   0.0,   0.0,  10.0,   3.0,   1.0,  19.0,   4.0,   1.0,   4.0,   6.0,   1.0,   8.0,   0.0,   1.0],
                [   4.0,   1.0,9822.0,  36.0,   0.0,   4.0,   6.0,   6.0,  21.0,   3.0,   1.0,  13.0,   0.0,   1.0,   2.0,  20.0,   9.0,   1.0,   4.0,   1.0],
                [   6.0,   0.0,  42.0,9859.0,   0.0,   6.0,  53.0,   6.0,   4.0,   1.0,   0.0,   3.0,   0.0,   0.0,   1.0,   5.0,   3.0,   0.0,   0.0,   1.0],
                [   1.0,   1.0,   0.0,   0.0,9973.0,   0.0,   0.0,   0.0,   1.0,   1.0,   0.0,   0.0,   0.0,   0.0,   1.0,   5.0,   1.0,   0.0,   3.0,   2.0],
                [   3.0,   9.0,   4.0,   5.0,   0.0,9876.0,  27.0,   1.0,  23.0,   1.0,   3.0,   6.0,   4.0,   0.0,   6.0,   2.0,   2.0,   0.0,   0.0,   1.0],
                [  10.0,   0.0,   7.0,  56.0,   0.0,  35.0,9865.0,   4.0,   2.0,   3.0,   1.0,   4.0,   1.0,   0.0,   3.0,   4.0,   2.0,   0.0,   1.0,   2.0],
                [  21.0,   1.0,  12.0,  11.0,   1.0,   3.0,   7.0,9935.0,   1.0,   0.0,   1.0,   2.0,   1.0,   1.0,   3.0,  21.0,   3.0,   0.0,   0.0,   5.0],
                [   1.0,   8.0,  18.0,   3.0,   1.0,  20.0,   1.0,   0.0,9912.0,   0.0,   1.0,   1.0,   0.0,   2.0,   3.0,   1.0,   1.0,   1.0,   4.0,   1.0],
                [   2.0,   2.0,   3.0,   1.0,   2.0,   1.0,   2.0,   0.0,   0.0,9872.0,   9.0,   2.0,  12.0,   7.0,   0.0,   1.0,   7.0,   0.0,   1.0,  33.0],
                [   3.0,   1.0,   3.0,   0.0,   0.0,   6.0,   1.0,   1.0,   4.0,  22.0,9947.0,   2.0,  45.0,  13.0,   3.0,   1.0,   3.0,   4.0,   2.0,  15.0],
                [   2.0,  37.0,  25.0,   6.0,   0.0,  12.0,   7.0,   2.0,   2.0,   4.0,   1.0,9926.0,  20.0,   0.0,   3.0,   8.0,  11.0,   0.0,   1.0,   1.0],
                [   1.0,   1.0,   0.0,   0.0,   0.0,   2.0,   0.0,   0.0,   0.0,   5.0,   8.0,   4.0,9874.0,   1.0,   0.0,   1.0,   2.0,   0.0,   0.0,   4.0],
                [   1.0,   1.0,   1.0,   0.0,   0.0,   0.0,   0.0,   1.0,   2.0,   8.0,   6.0,   0.0,   4.0,9946.0,   0.0,   2.0,   1.0,   3.0,  28.0,   0.0],
                [  13.0,   5.0,   2.0,   1.0,   1.0,   8.0,   3.0,   2.0,   5.0,   1.0,   2.0,   2.0,   1.0,   1.0,9926.0,  12.0,   4.0,   0.0,   0.0,   2.0],
                [  28.0,  11.0,  34.0,   7.0,  11.0,   4.0,   6.0,  16.0,   2.0,   2.0,   1.0,   7.0,   4.0,   3.0,  17.0,9840.0,  38.0,   5.0,   2.0,   2.0],
                [  22.0,   2.0,  13.0,   4.0,   1.0,   3.0,   2.0,   2.0,   1.0,  11.0,   2.0,   8.0,   6.0,   1.0,   5.0,  32.0,9871.0,   0.0,   2.0,   9.0],
                [   0.0,   2.0,   0.0,   0.0,   0.0,   0.0,   0.0,   0.0,   0.0,   0.0,   0.0,   0.0,   0.0,   1.0,   0.0,   1.0,   0.0,9976.0,   1.0,   0.0],
                [   1.0,   0.0,   3.0,   0.0,   3.0,   0.0,   1.0,   0.0,   4.0,   1.0,   1.0,   0.0,   0.0,  21.0,   0.0,   1.0,   1.0,   2.0,9945.0,   1.0],
                [  13.0,   2.0,   1.0,   1.0,   3.0,   2.0,   2.0,   3.0,   3.0,  57.0,  11.0,   1.0,  17.0,   1.0,   3.0,   2.0,  10.0,   0.0,   2.0,9901.0]]


# This is the rose control file for nusA 
SequenceLen = 466
SequenceNum = 100
OutputFilebase = "nusA"
InputType = 20 /* PROTEIN */
TheAlphabet = "ARNDCQEGHILKMFPSTWYV"
TheFreq = [0.0824474050150271,0.0613196967658009,0.0409321311622482,0.0704929798591486,0.00488942717444938,0.0416274166778809,0.11321939622303,0.0567442695016373,0.00968914008881712,0.0863051181985377,0.0770196922800879,0.0694836944332302,0.0176064235410218,0.0261292782487776,0.0329475620149823,0.057058269411923,0.0378818463194725,0.0053828556048984,0.0210828511191854,0.0877405463598439]
TheTree = (((((((((((((((((n0:23,n1:23):9,n2:26):36,(n3:24,n4:29):3):2,n5:27):1,((n6:27,n7:28):4,n8:33):2):1,(n9:29,n10:23):1):4,(n11:32,n12:24):12):15,((((((n13:27,n14:29):1,n15:28):2,n16:30):2,n17:30):7,(((n18:30,n19:22):13,((n20:27,n21:33):10,n22:53):13):4,n23:42):4):6,n24:26):4):7,((((((n25:28,n26:39):3,n27:28):3,n28:25):3,n29:29):2,(((n30:26,n31:25):5,n32:24):5,n33:37):3):3,n34:38):2):2,n35:40):2,((((n36:24,n37:23):2,n38:29):34,n39:38):3,n40:51):2):1,((((((n41:29,n42:55):4,n43:26):3,n44:28):14,n45:36):4,n46:44):11,((((n47:30,n48:34):4,n49:32):8,n50:52):5,(n51:25,n52:25):27):3):3):1,(((n53:38,n54:39):12,n55:40):4,n56:43):8):2,((((((n57:33,(((n58:27,n59:21):3,n60:29):2,n61:25):3):20,((n62:34,n63:28):4,(n64:23,n65:33):10):18):5,n66:34):8,n67:47):9,n68:45):7,(((((n69:26,n70:25):2,n71:23):1,(n72:25,n73:24):2):1,(((n74:32,n75:27):5,n76:24):36,(((n77:24,n78:25):2,n79:37):3,n80:23):4):1):5,(((((((((n81:22,n82:36):1,n83:25):4,n84:27):3,n85:26):3,n86:36):9,n87:33):6,n88:37):2,(n89:29,n90:27):8):6,(((n91:25,n92:26):4,n93:40):6,n94:73):2):3):2):1):3,n95:41):4,(n96:27,n97:26):18):11,(n98:25,n99:24):11);

TheSequence = "MLSDLKRIIDQISRDRGIDKGILVSAIEEAVESAAKKKFGSRRDIEVRYNEEYGEVDVFQFRTVVEEIEDEQTEIALEDARILDPAVQLGDDLGEKMSNITDLGRIAAQSAKQVIINRMKDAERDVIYDMYKDRVGEVVSGIVQRFERGNMVVNLGRTDAILPKEHQIPKRTFKQGDRIRAYLLEVRQTSRDCQLILSRTCDEFLEKLFQMEVPEMSEGIVRVLGVSREPGFRAKIAVSSSESDVDPVGACVGMKGSRVQNVVQELQGERIDIVTWSPDIAKYVYNALAPAHVSMVRNDEERNSLLVVVPNDQLSLAIGRQGQNVRLASRLLGCRIDVKSEQRYANLQDPGYQSLLKIHGIDEGLADQLWARGIVSTAVLAQTEIADLTVLRAINEEFAAALVKDAQANPFVAEETEISSVEASEAENINADTVDAESSEEAVVVEEITDNAEAGQDPEEPTTQQQ"
TheMutationProbability = [0.08941,1.486,1.898,1.273,1.352,1.726,1.961,0.99,0.7569,1.674,1.326,0.99,0.8055,1.49,0.6006,0.6224,1.435,0.6177,1.413,1.986,1.747,2.212,0.99,1.545,1.999,0.8843,0.99,0.7904,2.794,0.4031,0.8383,2.018,1.881,0.4449,0.6986,1.595,0.7864,1.841,2.606,1.43,1.998,1.763,2.888,1.307,0.9421,1.696,0.5056,3.059,0.5864,0.4878,1.711,1.856,1.026,0.4733,2.162,1.408,2.326,0.7609,2.725,1.089,3.091,1.605,2.911,0.494,0.1945,1.126,1.478,1.273,2.258,0.8219,2.077,3.101,3.065,0.875,0.5564,1.242,1.071,2.077,1.706,0.2093,1.822,2.193,2.897,1.094,2.071,3.065,2.567,1.741,1.694,0.72,0.5894,3.074,1.161,2.647,1.738,1.99,0.99,0.99,1.194,1.976,1.832,1.702,0.8862,0.8506,0.2291,0.7786,0.4746,0.415,0.8393,0.99,0.3372,0.6683,0.4246,0.7272,0.7993,1.954,0.4059,0.99,0.9416,0.795,0.9717,0.8989,0.5448,0.5591,1.769,3.044,0.9449,1.696,1.936,0.99,0.99,1.646,1.882,0.99,1.846,0.7611,1.305,0.976,0.9032,0.99,0.4355,1.324,0.4335,0.99,0.5301,2.221,1.203,1.72,1.781,1.629,0.99,1.335,0.7913,0.9434,1.107,0.5991,1.368,1.537,0.5163,0.5315,1.369,0.9328,0.9178,1.904,1.678,0.7716,0.8557,0.7202,1.374,1.558,0.3206,2.546,0.99,1.558,2.799,0.794,0.8765,0.7771,0.99,0.8418,0.681,1.566,0.8542,2.859,1.863,0.2427,2.309,2.015,1.675,2.139,0.9992,0.9054,0.9061,1.092,0.6159,0.99,0.5903,0.08948,0.1073,0.7537,0.99,1.31,2.64,0.6568,0.99,1.719,0.99,0.2194,0.6152,0.9166,2.207,0.1878,0.2812,0.2284,0.09033,0.3727,2.749,0.88,0.5406,1.44,0.3849,0.9422,0.208,1.312,0.99,0.8377,0.4784,0.08945,0.4599,0.5011,0.09555,1.533,0.0977,0.5385,0.0898,0.5437,0.2722,0.1279,3.049,0.421,1.675,0.7868,2.479,1.05,0.6438,0.1739,0.3209,0.4529,0.1178,0.3453,0.4688,0.4142,0.09201,1.343,0.7724,0.09551,0.9892,0.09089,0.2355,0.6106,0.99,0.3636,0.6588,1.477,0.2555,0.1415,1.895,0.7992,0.08966,0.4252,0.2474,0.09673,0.5084,0.6846,2.072,0.99,0.6799,2.102,0.4544,1.962,0.99,2.032,0.99,0.4954,1.478,0.4844,0.3442,0.7209,0.8012,0.0932,0.3155,1.363,0.5809,1.703,1.709,0.481,3.096,1.085,0.7816,0.99,2.097,3.036,1.697,1.97,0.6408,1.923,0.4756,0.99,0.2011,1.464,1.201,1.474,0.5858,0.5427,0.2951,0.7024,0.1389,0.09456,0.09201,0.5263,1.367,0.1037,0.5351,0.08958,0.3723,0.3494,0.09174,0.2225,0.3262,0.99,0.2784,0.5045,0.736,1.433,1.353,0.4084,0.3365,0.4067,1.545,0.7059,1.748,1.75,1.814,3.085,2.692,1.918,2.04,2.971,2.799,2.892,1.703,2.93,3.099,2.326,1.417,2.192,1.723,3.08,2.06,1.592,1.577,1.548,1.343,2.442,2.207,1.09,2.403,2.82,1.306,1.704,3.023,1.942,0.7879,1.657,1.948,1.208,2.047,1.178,1.723,1.492,1.179,2.771,1.899,2.215,3.09,1.656,1.47,1.168,2.028,3.02,1.532,1.784,1.15,1.562,1.396,1.779,1.99,2.254,1.255,2.606,1.703,1.137,2.915,2.534,1.502,0.7782,3.077,2.957,2.754,2.883,1.964,3.062,2.504,2.534,2.289,1.761,3.012,2.455,2.326,1.839,2.286,2.35,2.999,3.043,2.397,1.962,2.093,1.748,1.589,2.061,1.537,1.66,1.533,2.145,2.01,2.531,2.482,2.16,2.541,1.747,2.522,1.591,2.443,3.051,1.817,1.886,2.854,2.219,2.3,3.079,2.823,2.174,1.649,2.387,3.045,2.455,1.517,1.545,1.458,2.626,1.898,1.498,2.785,0.997,2.516,1.302]

TheInsertThreshold = 0.001
TheDeleteThreshold = 0.001
TheInsFunc = [.4,.3,.1,.01,.01,.01,.01]
TheDelFunc = [.4,.3,.1,.01,.01,.01,.01]

ThePAMMatrix = [[9867.0,   2.0,   9.0,  10.0,   3.0,   8.0,  17.0,  21.0,   2.0,   6.0,   4.0,   2.0,   6.0,   2.0,  22.0,  35.0,  32.0,   0.0,   2.0,  18.0],
                [   1.0,9913.0,   1.0,   0.0,   1.0,  10.0,   0.0,   0.0,  10.0,   3.0,   1.0,  19.0,   4.0,   1.0,   4.0,   6.0,   1.0,   8.0,   0.0,   1.0],
                [   4.0,   1.0,9822.0,  36.0,   0.0,   4.0,   6.0,   6.0,  21.0,   3.0,   1.0,  13.0,   0.0,   1.0,   2.0,  20.0,   9.0,   1.0,   4.0,   1.0],
                [   6.0,   0.0,  42.0,9859.0,   0.0,   6.0,  53.0,   6.0,   4.0,   1.0,   0.0,   3.0,   0.0,   0.0,   1.0,   5.0,   3.0,   0.0,   0.0,   1.0],
                [   1.0,   1.0,   0.0,   0.0,9973.0,   0.0,   0.0,   0.0,   1.0,   1.0,   0.0,   0.0,   0.0,   0.0,   1.0,   5.0,   1.0,   0.0,   3.0,   2.0],
                [   3.0,   9.0,   4.0,   5.0,   0.0,9876.0,  27.0,   1.0,  23.0,   1.0,   3.0,   6.0,   4.0,   0.0,   6.0,   2.0,   2.0,   0.0,   0.0,   1.0],
                [  10.0,   0.0,   7.0,  56.0,   0.0,  35.0,9865.0,   4.0,   2.0,   3.0,   1.0,   4.0,   1.0,   0.0,   3.0,   4.0,   2.0,   0.0,   1.0,   2.0],
                [  21.0,   1.0,  12.0,  11.0,   1.0,   3.0,   7.0,9935.0,   1.0,   0.0,   1.0,   2.0,   1.0,   1.0,   3.0,  21.0,   3.0,   0.0,   0.0,   5.0],
                [   1.0,   8.0,  18.0,   3.0,   1.0,  20.0,   1.0,   0.0,9912.0,   0.0,   1.0,   1.0,   0.0,   2.0,   3.0,   1.0,   1.0,   1.0,   4.0,   1.0],
                [   2.0,   2.0,   3.0,   1.0,   2.0,   1.0,   2.0,   0.0,   0.0,9872.0,   9.0,   2.0,  12.0,   7.0,   0.0,   1.0,   7.0,   0.0,   1.0,  33.0],
                [   3.0,   1.0,   3.0,   0.0,   0.0,   6.0,   1.0,   1.0,   4.0,  22.0,9947.0,   2.0,  45.0,  13.0,   3.0,   1.0,   3.0,   4.0,   2.0,  15.0],
                [   2.0,  37.0,  25.0,   6.0,   0.0,  12.0,   7.0,   2.0,   2.0,   4.0,   1.0,9926.0,  20.0,   0.0,   3.0,   8.0,  11.0,   0.0,   1.0,   1.0],
                [   1.0,   1.0,   0.0,   0.0,   0.0,   2.0,   0.0,   0.0,   0.0,   5.0,   8.0,   4.0,9874.0,   1.0,   0.0,   1.0,   2.0,   0.0,   0.0,   4.0],
                [   1.0,   1.0,   1.0,   0.0,   0.0,   0.0,   0.0,   1.0,   2.0,   8.0,   6.0,   0.0,   4.0,9946.0,   0.0,   2.0,   1.0,   3.0,  28.0,   0.0],
                [  13.0,   5.0,   2.0,   1.0,   1.0,   8.0,   3.0,   2.0,   5.0,   1.0,   2.0,   2.0,   1.0,   1.0,9926.0,  12.0,   4.0,   0.0,   0.0,   2.0],
                [  28.0,  11.0,  34.0,   7.0,  11.0,   4.0,   6.0,  16.0,   2.0,   2.0,   1.0,   7.0,   4.0,   3.0,  17.0,9840.0,  38.0,   5.0,   2.0,   2.0],
                [  22.0,   2.0,  13.0,   4.0,   1.0,   3.0,   2.0,   2.0,   1.0,  11.0,   2.0,   8.0,   6.0,   1.0,   5.0,  32.0,9871.0,   0.0,   2.0,   9.0],
                [   0.0,   2.0,   0.0,   0.0,   0.0,   0.0,   0.0,   0.0,   0.0,   0.0,   0.0,   0.0,   0.0,   1.0,   0.0,   1.0,   0.0,9976.0,   1.0,   0.0],
                [   1.0,   0.0,   3.0,   0.0,   3.0,   0.0,   1.0,   0.0,   4.0,   1.0,   1.0,   0.0,   0.0,  21.0,   0.0,   1.0,   1.0,   2.0,9945.0,   1.0],
                [  13.0,   2.0,   1.0,   1.0,   3.0,   2.0,   2.0,   3.0,   3.0,  57.0,  11.0,   1.0,  17.0,   1.0,   3.0,   2.0,  10.0,   0.0,   2.0,9901.0]]


# This is the rose control file for pgk 
SequenceLen = 398
SequenceNum = 100
OutputFilebase = "pgk"
InputType = 20 /* PROTEIN */
TheAlphabet = "ARNDCQEGHILKMFPSTWYV"
TheFreq = [0.1069163470457,0.0364493244090146,0.0397583414805345,0.0615176355568925,0.00834774761224336,0.0211075179865132,0.0708430473039031,0.0902960567546564,0.0165450853575995,0.0654784287182573,0.0999974931688852,0.0764332806898799,0.0212077912311048,0.0396831365470908,0.0385299942342884,0.0559274021709157,0.0457496678448773,0.00458750094006167,0.0162693339349728,0.0843548670126094]
TheTree = (((((((((((((((((n0:18,n1:18):7,n2:21):28,(n3:19,n4:23):2):1,n5:21):1,((n6:21,n7:22):3,n8:26):1):1,(n9:23,n10:19):1):3,(n11:26,n12:19):9):12,((((((n13:21,n14:23):1,n15:22):1,n16:23):1,n17:24):6,(((n18:24,n19:17):11,((n20:22,n21:26):8,n22:42):10):3,n23:33):3):5,n24:20):3):5,((((((n25:22,n26:31):3,n27:22):2,n28:20):2,n29:23):2,(((n30:20,n31:19):4,n32:19):3,n33:29):2):2,n34:30):2):2,n35:31):2,((((n36:19,n37:18):1,n38:23):27,n39:30):3,n40:40):2):1,((((((n41:23,n42:44):3,n43:20):2,n44:22):11,n45:28):3,n46:35):9,((((n47:24,n48:27):3,n49:26):6,n50:41):4,(n51:20,n52:20):21):3):2):1,(((n53:30,n54:31):9,n55:31):3,n56:34):6):2,((((((n57:26,(((n58:22,n59:16):2,n60:23):2,n61:20):2):16,((n62:27,n63:22):3,(n64:18,n65:26):8):14):4,n66:27):6,n67:37):7,n68:36):5,(((((n69:20,n70:20):1,n71:18):1,(n72:20,n73:19):2):1,(((n74:25,n75:21):4,n76:19):29,(((n77:19,n78:20):2,n79:29):2,n80:18):3):1):4,(((((((((n81:17,n82:28):1,n83:20):3,n84:21):2,n85:21):2,n86:29):7,n87:26):5,n88:30):2,(n89:23,n90:21):6):5,(((n91:20,n92:21):3,n93:31):5,n94:58):1):2):2):1):2,n95:32):3,(n96:22,n97:21):15):8,(n98:19,n99:19):8);

TheSequence = "MPSFKRIPDAGNLTGKVALVRVDFNVPMENGLVTDDTRLRAAVDTVQSLRTAGAKVALLAHFGRPKGERVAEMSLAPIAGAFAKVLGANVSFVADCKGDHVKSAIADLLPAGVILLENTRFYKGEEKGDMELAKEIAALGDLYVNDAFSAAHRRHVSTAVLADLLPAYAGVTMEAELDALDKALGAPERPVMAIVGGAKVSSKIDLLKNLVSKVDMLAIGGGMANTFLAADGVNVGKSLCEHDLAPTVREIQAAAKAAGCEILLPKDVVVAKEFKANAENRTCGLNEIGADEMVLDAGAATITYLSEALGRAKTVIWNGPLGAFEMTPFDTATVKVAETAAKLAKSGALVAVAGGGDTVAALNHAGVAQDFTFISTAGGAFLEWMEGKELPGVEALLK"
TheMutationProbability = [0.1074,2.609,2.609,2.553,2.29,0.99,0.99,2.609,0.9185,2.076,2.134,1.224,2.116,2.609,0.99,0.3752,1.203,0.2603,0.99,0.8189,0.1075,0.701,0.1074,0.727,0.1074,0.1074,0.1083,1.22,2.609,2.574,1.004,2.609,0.5326,0.99,0.3734,0.99,0.99,0.1076,0.3702,2.609,0.7321,0.7109,0.99,0.497,0.1176,0.3711,2.609,2.602,0.99,2.609,2.608,2.609,0.99,0.5534,1.372,0.9321,0.8264,0.7806,1.674,0.1088,0.1074,0.3891,0.1214,0.1161,0.3344,1.027,1.06,2.609,2.609,2.607,2.609,2.221,2.609,0.1131,0.3813,2.586,0.6941,0.6594,0.6983,2.609,2.609,0.6844,1.979,2.609,2.428,1.012,2.609,2.609,2.609,0.335,2.609,0.99,1.223,2.609,1.222,1.257,1.55,0.8097,2.609,2.577,1.151,2.609,2.609,2.608,1.225,2.609,2.609,0.99,2.609,2.609,0.607,2.542,0.7673,1.323,0.99,0.6165,0.1189,0.1074,0.99,0.1074,0.5806,1.22,2.609,0.99,0.1075,1.162,1.237,0.3904,0.7079,2.609,2.609,0.7391,0.464,2.176,2.609,0.8732,0.1379,0.99,1.195,1.224,0.4089,1.216,0.99,0.3511,0.3582,0.1075,0.1075,0.1091,0.2917,0.6977,0.5597,0.1074,0.1074,0.7115,0.3573,0.3635,0.1075,0.411,2.607,0.99,0.7583,0.99,2.609,2.609,1.231,2.546,0.99,0.99,0.7026,0.1079,1.841,0.3849,0.99,1.864,0.99,0.1075,0.99,2.609,2.609,0.6799,2.609,2.58,1.226,0.99,2.609,2.449,0.5219,2.609,0.99,0.1083,0.99,0.9169,0.3713,0.5771,0.99,0.1123,0.1079,0.4481,0.1076,0.3605,0.1122,0.5759,0.1075,0.5458,2.609,0.7002,0.7052,2.562,0.99,0.3834,2.145,2.609,0.99,0.7495,0.6548,2.607,0.99,0.99,0.3534,0.3757,0.1079,0.7494,0.1116,0.5181,0.99,0.1541,0.1272,0.9782,0.99,0.3641,2.484,0.3543,2.609,2.609,0.8,0.2456,2.242,0.1074,0.7647,2.332,0.2822,2.609,0.9964,2.609,2.608,2.605,2.608,0.3683,2.609,2.609,1.365,2.196,2.609,2.609,0.4922,2.609,2.609,2.608,1.898,1.084,1.395,0.99,2.462,0.4946,0.2647,2.512,0.1076,1.385,0.7341,0.99,0.7029,2.609,2.609,2.241,2.607,2.596,2.609,0.99,2.609,2.609,2.609,2.609,1.981,2.609,2.608,2.609,2.609,0.6632,0.99,2.609,1.689,2.609,0.99,0.7531,0.99,0.1074,0.405,0.1123,0.8678,2.553,0.5873,2.599,2.609,2.609,0.99,2.609,2.609,2.609,0.9695,2.609,2.609,0.6794,0.99,0.1085,0.6996,1.342,0.2054,0.1074,0.1079,0.1081,0.7489,0.1079,0.4056,0.3967,0.1075,2.609,2.609,2.598,0.5243,0.99,2.609,0.1114,0.1264,2.609,1.38,0.99,0.6568,2.609,0.99,0.99,0.6971,2.609,1.231,2.609,2.609,2.589,0.5207,0.7205,1.06,2.609,0.6996,0.7908,0.6981,0.1128,0.109,0.1099,0.1076,0.2661,0.99,0.7543,0.3565,0.99,2.609,2.574,0.99,0.7543,2.608,1.341,0.99,2.609,1.303,0.6972,0.4888,0.99,0.1074,0.1074,0.2727,0.1079,0.1079,0.1074,0.3358,0.2041,0.672,0.99,0.99,0.4381,0.6569,0.99,2.609,0.112,0.2111,0.3971,0.99,2.608,0.99,0.3809,2.609,2.609]

TheInsertThreshold = 0.001
TheDeleteThreshold = 0.001
TheInsFunc = [.4,.3,.1,.01,.01,.01,.01]
TheDelFunc = [.4,.3,.1,.01,.01,.01,.01]

ThePAMMatrix = [[9867.0,   2.0,   9.0,  10.0,   3.0,   8.0,  17.0,  21.0,   2.0,   6.0,   4.0,   2.0,   6.0,   2.0,  22.0,  35.0,  32.0,   0.0,   2.0,  18.0],
                [   1.0,9913.0,   1.0,   0.0,   1.0,  10.0,   0.0,   0.0,  10.0,   3.0,   1.0,  19.0,   4.0,   1.0,   4.0,   6.0,   1.0,   8.0,   0.0,   1.0],
                [   4.0,   1.0,9822.0,  36.0,   0.0,   4.0,   6.0,   6.0,  21.0,   3.0,   1.0,  13.0,   0.0,   1.0,   2.0,  20.0,   9.0,   1.0,   4.0,   1.0],
                [   6.0,   0.0,  42.0,9859.0,   0.0,   6.0,  53.0,   6.0,   4.0,   1.0,   0.0,   3.0,   0.0,   0.0,   1.0,   5.0,   3.0,   0.0,   0.0,   1.0],
                [   1.0,   1.0,   0.0,   0.0,9973.0,   0.0,   0.0,   0.0,   1.0,   1.0,   0.0,   0.0,   0.0,   0.0,   1.0,   5.0,   1.0,   0.0,   3.0,   2.0],
                [   3.0,   9.0,   4.0,   5.0,   0.0,9876.0,  27.0,   1.0,  23.0,   1.0,   3.0,   6.0,   4.0,   0.0,   6.0,   2.0,   2.0,   0.0,   0.0,   1.0],
                [  10.0,   0.0,   7.0,  56.0,   0.0,  35.0,9865.0,   4.0,   2.0,   3.0,   1.0,   4.0,   1.0,   0.0,   3.0,   4.0,   2.0,   0.0,   1.0,   2.0],
                [  21.0,   1.0,  12.0,  11.0,   1.0,   3.0,   7.0,9935.0,   1.0,   0.0,   1.0,   2.0,   1.0,   1.0,   3.0,  21.0,   3.0,   0.0,   0.0,   5.0],
                [   1.0,   8.0,  18.0,   3.0,   1.0,  20.0,   1.0,   0.0,9912.0,   0.0,   1.0,   1.0,   0.0,   2.0,   3.0,   1.0,   1.0,   1.0,   4.0,   1.0],
                [   2.0,   2.0,   3.0,   1.0,   2.0,   1.0,   2.0,   0.0,   0.0,9872.0,   9.0,   2.0,  12.0,   7.0,   0.0,   1.0,   7.0,   0.0,   1.0,  33.0],
                [   3.0,   1.0,   3.0,   0.0,   0.0,   6.0,   1.0,   1.0,   4.0,  22.0,9947.0,   2.0,  45.0,  13.0,   3.0,   1.0,   3.0,   4.0,   2.0,  15.0],
                [   2.0,  37.0,  25.0,   6.0,   0.0,  12.0,   7.0,   2.0,   2.0,   4.0,   1.0,9926.0,  20.0,   0.0,   3.0,   8.0,  11.0,   0.0,   1.0,   1.0],
                [   1.0,   1.0,   0.0,   0.0,   0.0,   2.0,   0.0,   0.0,   0.0,   5.0,   8.0,   4.0,9874.0,   1.0,   0.0,   1.0,   2.0,   0.0,   0.0,   4.0],
                [   1.0,   1.0,   1.0,   0.0,   0.0,   0.0,   0.0,   1.0,   2.0,   8.0,   6.0,   0.0,   4.0,9946.0,   0.0,   2.0,   1.0,   3.0,  28.0,   0.0],
                [  13.0,   5.0,   2.0,   1.0,   1.0,   8.0,   3.0,   2.0,   5.0,   1.0,   2.0,   2.0,   1.0,   1.0,9926.0,  12.0,   4.0,   0.0,   0.0,   2.0],
                [  28.0,  11.0,  34.0,   7.0,  11.0,   4.0,   6.0,  16.0,   2.0,   2.0,   1.0,   7.0,   4.0,   3.0,  17.0,9840.0,  38.0,   5.0,   2.0,   2.0],
                [  22.0,   2.0,  13.0,   4.0,   1.0,   3.0,   2.0,   2.0,   1.0,  11.0,   2.0,   8.0,   6.0,   1.0,   5.0,  32.0,9871.0,   0.0,   2.0,   9.0],
                [   0.0,   2.0,   0.0,   0.0,   0.0,   0.0,   0.0,   0.0,   0.0,   0.0,   0.0,   0.0,   0.0,   1.0,   0.0,   1.0,   0.0,9976.0,   1.0,   0.0],
                [   1.0,   0.0,   3.0,   0.0,   3.0,   0.0,   1.0,   0.0,   4.0,   1.0,   1.0,   0.0,   0.0,  21.0,   0.0,   1.0,   1.0,   2.0,9945.0,   1.0],
                [  13.0,   2.0,   1.0,   1.0,   3.0,   2.0,   2.0,   3.0,   3.0,  57.0,  11.0,   1.0,  17.0,   1.0,   3.0,   2.0,  10.0,   0.0,   2.0,9901.0]]


# This is the rose control file for pyrG 
SequenceLen = 544
SequenceNum = 100
OutputFilebase = "pyrG"
InputType = 20 /* PROTEIN */
TheAlphabet = "ARNDCQEGHILKMFPSTWYV"
TheFreq = [0.0669942286694743,0.0523514272344408,0.0391124629542973,0.054086725939791,0.0122445796287631,0.0330291686164405,0.0764506317267197,0.0831578536889721,0.0303189829979722,0.0776399937607238,0.0888511932615817,0.0616518483855873,0.0195172360006239,0.038449539853377,0.0442013726407737,0.0542037123693652,0.0501871782873187,0.00571283731087194,0.0345304944626423,0.0773085322102636]
TheTree = (((((((((((((((((n0:21,n1:21):8,n2:24):33,(n3:21,n4:27):2):2,n5:24):1,((n6:24,n7:26):4,n8:30):1):1,(n9:27,n10:21):1):3,(n11:29,n12:22):11):14,((((((n13:25,n14:26):1,n15:25):2,n16:27):1,n17:27):6,(((n18:27,n19:20):12,((n20:25,n21:30):9,n22:48):12):4,n23:38):3):6,n24:23):4):6,((((((n25:25,n26:35):3,n27:26):3,n28:23):2,n29:26):2,(((n30:23,n31:22):4,n32:22):4,n33:34):3):3,n34:35):2):2,n35:36):2,((((n36:22,n37:21):1,n38:27):31,n39:34):3,n40:46):2):1,((((((n41:26,n42:50):4,n43:23):2,n44:26):13,n45:33):4,n46:40):10,((((n47:27,n48:31):4,n49:29):7,n50:48):5,(n51:22,n52:23):25):3):2):1,(((n53:34,n54:35):10,n55:36):4,n56:39):7):2,((((((n57:30,(((n58:25,n59:19):3,n60:26):2,n61:22):3):18,((n62:31,n63:25):3,(n64:20,n65:30):9):17):4,n66:31):7,n67:43):8,n68:41):6,(((((n69:23,n70:23):2,n71:21):1,(n72:22,n73:22):2):1,(((n74:29,n75:24):5,n76:22):33,(((n77:21,n78:22):2,n79:34):2,n80:21):4):1):4,(((((((((n81:20,n82:32):1,n83:23):3,n84:24):3,n85:24):2,n86:33):8,n87:30):6,n88:34):2,(n89:26,n90:25):7):6,(((n91:22,n92:24):3,n93:36):5,n94:67):2):2):2):1):2,n95:37):3,(n96:25,n97:24):17):10,(n98:22,n99:22):10);


TheSequence = "MKYIFVTGGVVSSLGKGVASASLGALLRARGYKVTAVKIDPYINIDAGTMRPYEHGECFVTASGAETDLDIGNYERFLDLDIPAGSNITTGQVYQEVIRKERAGDYLSQTVQVIPHVTDEIKRRIRAAGESAGAEIVLIEVGGTVGDIESLPFLEAIRQFRFDEGDDNVLYLHLTLVPYLGTSNEFKTKPTQHSVAALRSYGISPDIVMVRSKDKLPAEITRKIAAFTSVRENRVFSSYDVEHVYQVPLALEEQGLGKAVEELLGLEGTHPRLGVWTDAVRTIKHPKQQVTIAIAGKYTAMPDAYLSLMESLTHAGIANDARVNIKWVNAEQLAEAGAGELEGQFADVDGILVPGGFGIRGIEGKVKAAEYARTHGVPYLGICLGMQIAVIEYARHVAGIEDANSAEFDEYAKNKVIDLMPEQLEVAGMGGTMRLGDWPMELRAGTKIAELYGVPQGGTVKERHRHRYEVNPAYVEQLEAAGLTISGVTPGVEGRGAGLVETVEIADHPFFVALQAHPEFKSRPMRPSPPFAGFVKAALEHQQQ"
TheMutationProbability = [1.158,0.5164,0.99,0.5141,0.215,0.543,0.04051,0.04221,0.04221,0.03962,0.5559,0.03921,0.2114,0.5531,0.04211,0.0398,0.04211,0.5419,0.99,0.5548,0.238,0.2147,0.9472,0.6089,0.99,0.628,0.2266,0.5508,0.99,0.5546,0.2328,2.803,3.039,0.2192,0.99,2.7,0.99,0.0398,0.99,0.03944,0.05022,0.04298,0.6497,0.03924,0.538,0.04651,0.249,0.0579,0.08044,0.2073,0.4794,0.04096,2.518,0.2766,0.03932,0.04211,0.03966,0.1681,0.9405,0.05136,0.04109,0.99,0.04065,0.04211,0.5474,0.03966,0.2154,0.03944,0.05248,0.03944,0.5385,0.04211,0.2247,0.04298,0.04248,0.03947,0.174,1.13,1.159,3.038,2.966,0.99,0.99,0.99,3.039,0.5466,0.509,0.99,0.07297,0.5918,0.04224,0.99,0.5508,0.2823,3.039,3.038,0.4666,0.5997,3.039,0.99,0.03966,0.04105,0.99,0.05513,0.99,0.4901,0.7324,0.0533,3.039,0.03942,0.2258,0.03943,0.2994,0.2207,0.04096,0.03932,0.5537,0.211,0.99,0.5559,0.04939,0.5578,3.039,1.33,0.5778,3.039,3.039,3.038,1.146,3.027,3.039,3.039,3.039,3.039,0.2143,0.99,0.99,0.533,0.99,0.03966,0.5387,0.04211,0.04211,0.03941,0.3134,0.04211,0.03944,0.2149,0.03966,0.5342,0.99,0.2702,0.2591,0.99,0.05613,0.2149,0.5424,0.1968,0.2154,1.867,0.99,3.039,1.163,3.011,1.155,3.039,3.039,0.99,0.99,3.034,1.677,0.99,0.03932,0.99,0.2238,0.99,0.6875,0.2251,0.99,0.9614,3.039,1.159,0.9483,0.99,0.04178,1.603,0.0398,0.1968,0.0398,0.04961,0.2158,0.03943,0.2165,0.04263,0.2132,0.99,0.99,0.1682,0.5902,0.99,0.99,0.04211,0.2217,0.99,0.3749,0.2901,0.99,0.99,0.99,0.99,0.03947,0.6716,0.99,3.039,3.039,1.163,3.038,3.039,3.039,0.99,0.99,3.039,0.0398,0.5472,0.5852,0.99,0.5109,0.6475,0.5493,0.2382,3.039,3.039,3.039,0.99,0.2204,0.5727,2.918,1.518,3.039,0.2527,1.312,3.039,1.159,0.494,0.05822,1.751,0.99,0.08899,2.966,3.039,0.99,3.039,3.039,0.99,2.438,0.99,0.9376,3.039,3.039,0.6815,3.039,3.039,3.039,0.7753,3.039,1.146,3.039,3.039,3.039,3.039,1.295,0.99,0.99,3.039,3.039,0.2219,3.039,3.039,0.99,0.99,3.039,3.039,3.037,3.039,2.071,1.159,3.039,3.039,3.039,0.6137,2.94,0.5451,0.5501,0.99,0.5306,0.1834,0.0398,0.04298,0.99,3.039,0.99,3.039,0.2126,0.2282,0.04298,0.99,0.03921,0.5957,3.038,0.223,0.5357,0.5987,3.039,0.5136,0.5494,0.5455,1.412,3.028,0.99,3.039,2.992,1.922,0.5479,3.039,0.99,3.039,3.039,0.99,0.99,0.581,0.5553,3.039,2.028,1.427,3.039,3.039,2.535,2.851,2.162,2.731,3.039,1.83,3.039,3.039,0.555,3.039,3.039,1.458,0.99,0.7608,0.5503,0.9494,0.5388,0.2505,0.2684,0.1183,0.1096,0.04211,3.039,0.1998,0.2106,0.99,0.565,0.2376,0.3442,0.5341,3.039,0.5442,0.99,3.037,0.99,0.2136,0.04872,0.99,0.99,1.35,0.99,0.04096,0.99,0.99,0.05406,0.2284,0.06405,0.5662,0.04211,0.5058,0.1971,2.864,0.5475,0.99,0.6447,0.2196,0.99,0.2167,0.1574,0.99,0.5611,1.658,0.99,3.026,3.039,2.993,0.03966,0.99,0.2135,0.99,0.03966,1.15,1.293,3.039,3.039,0.99,3.039,2.965,0.8978,0.5056,0.5473,3.024,0.99,0.99,1.574,1.16,0.5715,3.039,3.039,3.039,3.039,0.99,3.039,0.2647,0.5234,0.2163,0.2424,0.03947,0.1703,0.04211,0.99,0.9878,3.039,0.99,3.039,0.9441,3.039,3.039,0.99,0.5469,3.039,0.99,3.039,3.039,0.99,0.04298,2.909,1,1,1,3.039,3.039,3.039,0.99,3.039,0.05674,0.03947,0.06468,0.04073,0.03932,0.04074,0.6221,0.2167,0.99,0.2127,0.99,3.039,0.8799,2.593,3.039,3.039,1.161,1.205,3.039,2.966,0.5148,0.99,3.039,1.983,0.5481,0.3146,3.039,0.5581,2.095,0.7401,0.6232,1.777,0.7401,0.6447,1.159,3.039,3.039,0.8494,0.5576,0.05276,0.99,0.99,0.03966,2.988,3.039,1.16,0.22,0.99,0.99,0.6969,0.99,0.99,0.99,0.04114,0.949,0.03994,0.04096,0.03966,0.9337,0.99,0.1149,0.6387,0.4862,2.817,3.039,0.8843,0.4904,0.4568,0.3862,0.1706,3.039,3.032,0.5624,0.7473,3.039,0.4454,0.8264,3.039,3.039,3.039,3.039,3.039,3.039]

TheInsertThreshold = 0.001
TheDeleteThreshold = 0.001
TheInsFunc = [.4,.3,.1,.01,.01,.01,.01]
TheDelFunc = [.4,.3,.1,.01,.01,.01,.01]

ThePAMMatrix = [[9867.0,   2.0,   9.0,  10.0,   3.0,   8.0,  17.0,  21.0,   2.0,   6.0,   4.0,   2.0,   6.0,   2.0,  22.0,  35.0,  32.0,   0.0,   2.0,  18.0],
                [   1.0,9913.0,   1.0,   0.0,   1.0,  10.0,   0.0,   0.0,  10.0,   3.0,   1.0,  19.0,   4.0,   1.0,   4.0,   6.0,   1.0,   8.0,   0.0,   1.0],
                [   4.0,   1.0,9822.0,  36.0,   0.0,   4.0,   6.0,   6.0,  21.0,   3.0,   1.0,  13.0,   0.0,   1.0,   2.0,  20.0,   9.0,   1.0,   4.0,   1.0],
                [   6.0,   0.0,  42.0,9859.0,   0.0,   6.0,  53.0,   6.0,   4.0,   1.0,   0.0,   3.0,   0.0,   0.0,   1.0,   5.0,   3.0,   0.0,   0.0,   1.0],
                [   1.0,   1.0,   0.0,   0.0,9973.0,   0.0,   0.0,   0.0,   1.0,   1.0,   0.0,   0.0,   0.0,   0.0,   1.0,   5.0,   1.0,   0.0,   3.0,   2.0],
                [   3.0,   9.0,   4.0,   5.0,   0.0,9876.0,  27.0,   1.0,  23.0,   1.0,   3.0,   6.0,   4.0,   0.0,   6.0,   2.0,   2.0,   0.0,   0.0,   1.0],
                [  10.0,   0.0,   7.0,  56.0,   0.0,  35.0,9865.0,   4.0,   2.0,   3.0,   1.0,   4.0,   1.0,   0.0,   3.0,   4.0,   2.0,   0.0,   1.0,   2.0],
                [  21.0,   1.0,  12.0,  11.0,   1.0,   3.0,   7.0,9935.0,   1.0,   0.0,   1.0,   2.0,   1.0,   1.0,   3.0,  21.0,   3.0,   0.0,   0.0,   5.0],
                [   1.0,   8.0,  18.0,   3.0,   1.0,  20.0,   1.0,   0.0,9912.0,   0.0,   1.0,   1.0,   0.0,   2.0,   3.0,   1.0,   1.0,   1.0,   4.0,   1.0],
                [   2.0,   2.0,   3.0,   1.0,   2.0,   1.0,   2.0,   0.0,   0.0,9872.0,   9.0,   2.0,  12.0,   7.0,   0.0,   1.0,   7.0,   0.0,   1.0,  33.0],
                [   3.0,   1.0,   3.0,   0.0,   0.0,   6.0,   1.0,   1.0,   4.0,  22.0,9947.0,   2.0,  45.0,  13.0,   3.0,   1.0,   3.0,   4.0,   2.0,  15.0],
                [   2.0,  37.0,  25.0,   6.0,   0.0,  12.0,   7.0,   2.0,   2.0,   4.0,   1.0,9926.0,  20.0,   0.0,   3.0,   8.0,  11.0,   0.0,   1.0,   1.0],
                [   1.0,   1.0,   0.0,   0.0,   0.0,   2.0,   0.0,   0.0,   0.0,   5.0,   8.0,   4.0,9874.0,   1.0,   0.0,   1.0,   2.0,   0.0,   0.0,   4.0],
                [   1.0,   1.0,   1.0,   0.0,   0.0,   0.0,   0.0,   1.0,   2.0,   8.0,   6.0,   0.0,   4.0,9946.0,   0.0,   2.0,   1.0,   3.0,  28.0,   0.0],
                [  13.0,   5.0,   2.0,   1.0,   1.0,   8.0,   3.0,   2.0,   5.0,   1.0,   2.0,   2.0,   1.0,   1.0,9926.0,  12.0,   4.0,   0.0,   0.0,   2.0],
                [  28.0,  11.0,  34.0,   7.0,  11.0,   4.0,   6.0,  16.0,   2.0,   2.0,   1.0,   7.0,   4.0,   3.0,  17.0,9840.0,  38.0,   5.0,   2.0,   2.0],
                [  22.0,   2.0,  13.0,   4.0,   1.0,   3.0,   2.0,   2.0,   1.0,  11.0,   2.0,   8.0,   6.0,   1.0,   5.0,  32.0,9871.0,   0.0,   2.0,   9.0],
                [   0.0,   2.0,   0.0,   0.0,   0.0,   0.0,   0.0,   0.0,   0.0,   0.0,   0.0,   0.0,   0.0,   1.0,   0.0,   1.0,   0.0,9976.0,   1.0,   0.0],
                [   1.0,   0.0,   3.0,   0.0,   3.0,   0.0,   1.0,   0.0,   4.0,   1.0,   1.0,   0.0,   0.0,  21.0,   0.0,   1.0,   1.0,   2.0,9945.0,   1.0],
                [  13.0,   2.0,   1.0,   1.0,   3.0,   2.0,   2.0,   3.0,   3.0,  57.0,  11.0,   1.0,  17.0,   1.0,   3.0,   2.0,  10.0,   0.0,   2.0,9901.0]]


# This is the rose control file for rplL 
SequenceLen = 126
SequenceNum = 100
OutputFilebase = "rplL"
InputType = 20 /* PROTEIN */
TheAlphabet = "ARNDCQEGHILKMFPSTWYV"
TheFreq = [0.171933871587851,0.00976547481737793,0.0206074586697424,0.0456747404844291,0.00146097654748174,0.0170703575547866,0.132641291810842,0.073202614379085,0.00199923106497501,0.0563629373317955,0.0867358708189158,0.116339869281046,0.0219915417147251,0.0205305651672434,0.0280661284121492,0.0430603613994617,0.0424452133794694,0.00261437908496732,0.00322952710495963,0.104267589388697]
TheTree = (((((((((((((((((n0:12,n1:12):5,n2:14):19,(n3:13,n4:16):1):1,n5:14):0,((n6:14,n7:15):2,n8:18):1):0,(n9:16,n10:13):1):2,(n11:17,n12:13):6):8,((((((n13:15,n14:16):1,n15:15):1,n16:16):1,n17:16):4,(((n18:16,n19:12):7,((n20:15,n21:18):5,n22:29):7):2,n23:23):2):3,n24:14):2):3,((((((n25:15,n26:21):2,n27:15):1,n28:14):1,n29:16):1,(((n30:14,n31:13):2,n32:13):2,n33:20):1):1,n34:21):1):1,n35:21):1,((((n36:13,n37:12):1,n38:16):19,n39:20):2,n40:28):1):0,((((((n41:15,n42:30):2,n43:14):1,n44:15):8,n45:19):2,n46:24):6,((((n47:16,n48:18):2,n49:17):4,n50:28):3,(n51:13,n52:14):15):2):1):0,(((n53:20,n54:21):6,n55:21):2,n56:23):4):1,((((((n57:18,(((n58:15,n59:11):1,n60:16):1,n61:13):1):11,((n62:19,n63:15):2,(n64:12,n65:18):5):10):2,n66:18):4,n67:26):5,n68:25):3,(((((n69:14,n70:14):1,n71:12):1,(n72:13,n73:13):1):0,(((n74:17,n75:14):3,n76:13):19,(((n77:13,n78:13):1,n79:20):1,n80:12):2):0):2,(((((((((n81:12,n82:19):0,n83:14):2,n84:14):1,n85:14):1,n86:20):5,n87:18):3,n88:20):1,(n89:16,n90:15):4):3,(((n91:13,n92:14):2,n93:21):3,n94:40):1):1):1):0):1,n95:22):2,(n96:15,n97:14):10):6,(n98:13,n99:13):6);

TheSequence = "MAKYTNDELLEAFGEMTLVELSEFVKAFEEKFDVEAAAPVAAVAAVAGAAAPAEEEKDEFDVILSAVGDKKIQVIKAVRAITNLGLAEAKALVDGAPKAVLEKAKKEDAEKAKAQLEEAGASVELK"
TheMutationProbability = [0.0947,1.064,1.816,2.697,1.571,2.71,2.192,2.054,1.382,0.99,1.923,1.874,0.8388,1.609,2.765,0.8933,0.7609,0.9013,1.982,0.5599,0.9695,1.324,0.99,0.4597,0.9489,0.99,1.615,1.317,0.3058,0.9914,1.344,0.8016,0.6427,0.3006,0.8687,0.2989,0.7548,0.7487,1.776,0.8511,0.9217,1.479,0.9459,1.35,0.99,2.228,2.006,1.85,2.491,1.531,1.437,1.006,1.384,1.738,0.8725,0.3822,0.99,0.7865,0.8261,0.4191,1.579,0.3176,1.767,0.4105,2.279,3.077,1.694,0.6076,2.863,1.47,0.09575,0.7289,2.911,0.2671,0.2302,0.09575,1.622,0.3518,0.3863,1.874,2.114,0.4018,0.9901,0.4234,0.3567,0.1235,0.5322,0.4824,0.2509,0.1214,1.479,0.99,0.3251,0.9196,1.871,1.075,0.5994,2.006,3.101,1.455,0.4638,0.7424,2.135,1.307,1.523,0.5117,2.015,0.99,0.09114,0.99,3.04,1.926,0.3638,1.704,1.835,0.977,0.99,1.56,0.7845,0.1656,0.3261,2.797,0.6326,0.99,1.687,0.6716]

TheInsertThreshold = 0.001
TheDeleteThreshold = 0.001
TheInsFunc = [.4,.3,.1,.01,.01,.01,.01]
TheDelFunc = [.4,.3,.1,.01,.01,.01,.01]

ThePAMMatrix = [[9867.0,   2.0,   9.0,  10.0,   3.0,   8.0,  17.0,  21.0,   2.0,   6.0,   4.0,   2.0,   6.0,   2.0,  22.0,  35.0,  32.0,   0.0,   2.0,  18.0],
                [   1.0,9913.0,   1.0,   0.0,   1.0,  10.0,   0.0,   0.0,  10.0,   3.0,   1.0,  19.0,   4.0,   1.0,   4.0,   6.0,   1.0,   8.0,   0.0,   1.0],
                [   4.0,   1.0,9822.0,  36.0,   0.0,   4.0,   6.0,   6.0,  21.0,   3.0,   1.0,  13.0,   0.0,   1.0,   2.0,  20.0,   9.0,   1.0,   4.0,   1.0],
                [   6.0,   0.0,  42.0,9859.0,   0.0,   6.0,  53.0,   6.0,   4.0,   1.0,   0.0,   3.0,   0.0,   0.0,   1.0,   5.0,   3.0,   0.0,   0.0,   1.0],
                [   1.0,   1.0,   0.0,   0.0,9973.0,   0.0,   0.0,   0.0,   1.0,   1.0,   0.0,   0.0,   0.0,   0.0,   1.0,   5.0,   1.0,   0.0,   3.0,   2.0],
                [   3.0,   9.0,   4.0,   5.0,   0.0,9876.0,  27.0,   1.0,  23.0,   1.0,   3.0,   6.0,   4.0,   0.0,   6.0,   2.0,   2.0,   0.0,   0.0,   1.0],
                [  10.0,   0.0,   7.0,  56.0,   0.0,  35.0,9865.0,   4.0,   2.0,   3.0,   1.0,   4.0,   1.0,   0.0,   3.0,   4.0,   2.0,   0.0,   1.0,   2.0],
                [  21.0,   1.0,  12.0,  11.0,   1.0,   3.0,   7.0,9935.0,   1.0,   0.0,   1.0,   2.0,   1.0,   1.0,   3.0,  21.0,   3.0,   0.0,   0.0,   5.0],
                [   1.0,   8.0,  18.0,   3.0,   1.0,  20.0,   1.0,   0.0,9912.0,   0.0,   1.0,   1.0,   0.0,   2.0,   3.0,   1.0,   1.0,   1.0,   4.0,   1.0],
                [   2.0,   2.0,   3.0,   1.0,   2.0,   1.0,   2.0,   0.0,   0.0,9872.0,   9.0,   2.0,  12.0,   7.0,   0.0,   1.0,   7.0,   0.0,   1.0,  33.0],
                [   3.0,   1.0,   3.0,   0.0,   0.0,   6.0,   1.0,   1.0,   4.0,  22.0,9947.0,   2.0,  45.0,  13.0,   3.0,   1.0,   3.0,   4.0,   2.0,  15.0],
                [   2.0,  37.0,  25.0,   6.0,   0.0,  12.0,   7.0,   2.0,   2.0,   4.0,   1.0,9926.0,  20.0,   0.0,   3.0,   8.0,  11.0,   0.0,   1.0,   1.0],
                [   1.0,   1.0,   0.0,   0.0,   0.0,   2.0,   0.0,   0.0,   0.0,   5.0,   8.0,   4.0,9874.0,   1.0,   0.0,   1.0,   2.0,   0.0,   0.0,   4.0],
                [   1.0,   1.0,   1.0,   0.0,   0.0,   0.0,   0.0,   1.0,   2.0,   8.0,   6.0,   0.0,   4.0,9946.0,   0.0,   2.0,   1.0,   3.0,  28.0,   0.0],
                [  13.0,   5.0,   2.0,   1.0,   1.0,   8.0,   3.0,   2.0,   5.0,   1.0,   2.0,   2.0,   1.0,   1.0,9926.0,  12.0,   4.0,   0.0,   0.0,   2.0],
                [  28.0,  11.0,  34.0,   7.0,  11.0,   4.0,   6.0,  16.0,   2.0,   2.0,   1.0,   7.0,   4.0,   3.0,  17.0,9840.0,  38.0,   5.0,   2.0,   2.0],
                [  22.0,   2.0,  13.0,   4.0,   1.0,   3.0,   2.0,   2.0,   1.0,  11.0,   2.0,   8.0,   6.0,   1.0,   5.0,  32.0,9871.0,   0.0,   2.0,   9.0],
                [   0.0,   2.0,   0.0,   0.0,   0.0,   0.0,   0.0,   0.0,   0.0,   0.0,   0.0,   0.0,   0.0,   1.0,   0.0,   1.0,   0.0,9976.0,   1.0,   0.0],
                [   1.0,   0.0,   3.0,   0.0,   3.0,   0.0,   1.0,   0.0,   4.0,   1.0,   1.0,   0.0,   0.0,  21.0,   0.0,   1.0,   1.0,   2.0,9945.0,   1.0],
                [  13.0,   2.0,   1.0,   1.0,   3.0,   2.0,   2.0,   3.0,   3.0,  57.0,  11.0,   1.0,  17.0,   1.0,   3.0,   2.0,  10.0,   0.0,   2.0,9901.0]]


# This is the rose control file for rpoB 
SequenceLen = 1291
SequenceNum = 100
OutputFilebase = "rpoB"
InputType = 20 /* PROTEIN */
TheAlphabet = "ARNDCQEGHILKMFPSTWYV"
TheFreq = [0.0619346809931403,0.0613655678989862,0.0425468949189583,0.0690599769319492,0.00560007284647605,0.0332513810477751,0.0840314453954957,0.0754188672372974,0.0170961573483883,0.0708811388332423,0.0897225763370364,0.0676713409822133,0.0234702240029139,0.0356947732653433,0.0425089540460147,0.0560614338614703,0.0496494263340011,0.00475778546712803,0.0297532325623748,0.0795240696897954]
TheTree = (((((((((((((((((n0:18,n1:18):7,n2:20):28,(n3:18,n4:23):2):1,n5:21):1,((n6:21,n7:22):3,n8:26):1):1,(n9:23,n10:18):1):3,(n11:25,n12:19):9):12,((((((n13:21,n14:22):1,n15:22):1,n16:23):1,n17:23):5,(((n18:23,n19:17):10,((n20:21,n21:26):8,n22:41):10):3,n23:32):3):5,n24:20):3):5,((((((n25:22,n26:30):3,n27:22):2,n28:20):2,n29:22):2,(((n30:20,n31:19):4,n32:19):3,n33:29):2):2,n34:30):2):2,n35:31):2,((((n36:18,n37:18):1,n38:23):27,n39:29):2,n40:40):2):1,((((((n41:22,n42:43):3,n43:20):2,n44:22):11,n45:28):3,n46:35):8,((((n47:23,n48:27):3,n49:25):6,n50:41):4,(n51:19,n52:20):21):3):2):1,(((n53:29,n54:30):9,n55:31):3,n56:33):6):2,((((((n57:26,(((n58:21,n59:16):2,n60:23):2,n61:19):2):15,((n62:27,n63:22):3,(n64:17,n65:26):8):14):3,n66:27):6,n67:37):7,n68:35):5,(((((n69:20,n70:20):1,n71:18):1,(n72:19,n73:19):1):1,(((n74:25,n75:21):4,n76:19):28,(((n77:18,n78:19):2,n79:29):2,n80:18):3):1):4,(((((((((n81:17,n82:28):1,n83:20):3,n84:21):2,n85:20):2,n86:28):7,n87:26):5,n88:29):2,(n89:22,n90:21):6):5,(((n91:19,n92:20):3,n93:31):5,n94:57):1):2):2):1):2,n95:32):3,(n96:21,n97:20):14):8,(n98:19,n99:18):8);

TheSequence = "MAYKIRKINRNVERRDYTKVSMNLSLPNLIGIQTETFEWFKTKGIQEVLDEFFPILSFDGSSVLTLENWGFKEPRLSVRQAKEESKIYDAPIYANLKLSVNKTEEIQKEFDGVVLDDALQILSKWLEEKTVSKNITFKQQSQNSYFFELTIKKSEKPDLIQIDIIEDKKTSLICNVSIYKSGEVFLGDFPLMTEAGTFIINGSQKVIVSQLVRSPGAYFNKELNRKTGEMIYFADIIPSRGTWLEYETDSKKIGNDAINPLYVKIDKSRKTTATSLLLAFGISKDDILNIFDNDEVLVETLQQDSIIGDFKIDWSNQVQEIYKKITQGETATSEGASKFINSILFDKRKYDLTKAGRFKLKQKLSIKNRILNRVIAEDIVDANNNVLIAKDTEVNKHNIKQISEILDQDVMSIDLNYLSDIPGTRKVQKIKVYKDSELKTDTTCLIGLTSSSNEEFITVADILSTVSYLLNLKYNIGEIDDIDNLGNRRVRTVGELLQNQFRMGLNRIDKNVKEKLATSDLYKVKTSTIINAKPLTAIIGEFFNLSQLSQFMDQINPLSELTNKRRLTALGSGGLSRDRAGLEVRDVHPSHYGRICPIETPEGPNIGLINNLSTYARVNEYGFITTPYRKVINGIIQNDQVEYLTADQEKNFIIAQSNVNQDENGKILDEIIVSRFNGDDYMAKVEEIDYIDVSPKQIVSVATSGIPFLENDDANRALMGANMQRQAVPLIKPESPIVATGIEFEAARDSGEAIVAKEDAIVKYVDSKTIITDGESGIRTYILSDYERSNNGTSLTQSPIVKVGDVVKKGEIIADGPSMDQGELAIGQNVVVAFSTYNGYNFEDAIVMSERIVIDDRFTSTHIDEYTLEVRNTKQGQEEVIREIPNMSEQAKRHLDAEGIVAIGTEVKVGDVLVGKVTPKGQVQLSPEDKLLHAIFGEKSRNVKDNSLRVPNGGEGIVQSIKRFKAKSALNPDGIELPADIIEVIKVYVVQKRKIQEGDKMSGRHGNKGIISRILPVEDMPHLEDGTPVDIILNPQGVPSRMNIGQILEIHLGMAAKKLNQKVITPAFEGLNEKELEEIMAEAGMTNYGKVTLIDGQTGEPFDKPIAVGVMYMLKLSHMVDDKIHARNVGPYSLITQQPLGGKAQNGGQRFGEMEVWALEAYGAAHTLREILTIKSDDIKGRSKTYEAIVRSKKIPEPGIPESFNVLSKEIMGLGFNMYMIDETGEKSVINAYDKKNFDADNYEDDEILVKTDTLYIDDEDVDAEFEDLTYVDENDILRSFESENDIDEEE"
TheMutationProbability = [0.04044,3.039,3.039,3.039,3.039,3.039,1.293,3.039,3.039,3.039,3.039,3.019,3.039,0.2399,0.99,0.99,0.99,0.99,2.926,1.163,3.039,2.929,3.039,3.039,3.039,3.027,0.3315,0.99,0.3672,0.6469,3.035,0.99,0.1041,3.037,3.039,0.09066,0.9812,3.039,3.039,0.2273,0.99,1.236,3.039,0.3329,0.5645,3.039,3.039,0.99,0.99,3.039,0.99,0.99,0.57,0.04205,0.1841,3.039,0.5424,3.039,0.99,1.623,3.035,1.22,3.039,0.5725,0.99,1.159,1.184,3.039,0.99,3.039,3.039,3.013,3.039,0.99,2.089,2.923,0.99,1.795,3.039,0.2281,0.6601,1.427,3.038,0.7302,0.99,3.039,0.2431,0.99,0.99,0.99,0.99,0.99,0.99,0.99,3.038,0.99,0.99,0.4356,3.039,0.99,3.039,2.954,2.686,1.403,2.249,2.522,2.434,2.792,1.396,2.363,1.159,1.162,2.894,2.845,3.018,3.024,1.292,2.989,3.039,1.075,2.752,2.387,2.304,1.555,2.762,2.664,3.034,3.004,3.029,3.031,3.039,1.166,1.077,1.159,1.085,1.726,2.454,1,1,1,1,1,1,1,1,1,1,1,1,1,1,1,1,1,1,1,1,1,1,1,1,1,1,1,1,1,1,1,1,1,1,1,1,1,1,1,1,1,1,0.9196,0.5528,1.159,1.166,0.5461,0.99,0.99,0.5376,0.99,0.99,0.04205,0.99,0.1936,0.1026,3.039,3.037,0.1951,0.5461,0.06253,0.5475,0.5452,0.04327,0.04365,0.55,0.1832,0.1068,0.1907,0.6494,0.1869,0.2405,0.03968,0.3491,0.5436,0.05449,0.04084,0.2276,0.06114,0.5597,0.99,0.5507,3.018,3.039,0.99,3.039,1.151,1.162,1.164,1.156,1.143,1.135,3.039,2.363,2.365,1.158,0.9815,0.7839,0.99,0.2232,0.04205,1.166,0.2605,0.04365,0.5404,0.321,0.99,0.2347,0.99,0.99,1.157,0.5468,3.039,1.155,0.9222,3.038,1.193,2.62,1.23,2.766,2.618,0.5359,2.045,2.915,3.034,0.99,0.5347,0.5512,0.2141,0.6354,0.7919,0.5173,0.5408,2.892,0.99,0.99,0.552,0.99,0.99,0.6202,0.99,0.2147,1.162,0.5436,3.039,1.16,3.039,3.039,3.039,0.5458,2.97,3.039,3.039,0.8486,3.039,3.039,2.221,3.039,3.039,0.99,3.039,3,0.6007,0.99,3.039,3.023,0.5425,3.039,1.325,3.039,1.227,3.039,3.008,3.025,2.964,2.789,1.881,3.039,0.99,0.4684,0.99,3.039,0.99,0.5529,0.6088,0.99,0.99,0.9741,0.2616,0.609,0.776,0.6965,0.99,0.99,0.99,3.039,1.161,1.16,0.5387,3.039,3.039,0.99,0.99,3.039,3.039,0.99,0.7829,0.3957,0.99,3.039,1.182,0.5975,0.2321,0.4658,0.344,0.6194,3.039,0.2146,0.0435,0.04207,0.99,0.2732,1.744,0.2788,1.371,0.6553,0.5814,3.039,2.448,3.039,3.039,2.633,3.004,3.039,3.039,3.039,3.039,3.039,2.998,3.039,3.039,2.825,2.998,2.751,2.963,2.69,2.814,1.102,2.762,2.37,2.457,3.008,2.502,2.674,1.492,2.987,3.019,3.029,0.7111,2.789,1.91,2.791,1.095,2.898,1.785,2.94,2.803,1.183,1.149,2.579,3.039,3.039,3.027,2.82,3.005,2.977,2.985,2.114,3.009,3.026,2.997,2.109,3.037,3.036,2.378,3.032,3.038,3.03,3.038,2.992,3.035,3.039,1.734,2.169,2.417,2.424,1.889,2.016,1.699,1.331,2.992,2.658,2.252,2.846,3.012,2.886,2.923,3.037,1.089,3.035,3.027,1.716,1.855,2.056,1.84,1.719,0.9446,2.577,2.957,2.935,1.156,3.039,3.034,0.05317,0.568,0.99,2.925,0.99,0.99,1.741,3.017,0.99,1.311,3.039,0.526,3.039,1.608,1.195,3.039,2.529,3.039,1.331,0.03966,0.09792,0.2157,0.05383,0.2182,0.1822,0.5152,0.04282,0.1028,0.03971,0.718,0.171,0.99,0.2246,0.2176,0.04003,0.2282,0.99,0.99,0.5335,0.4322,1.455,0.5506,0.99,0.2175,0.7172,0.99,0.2567,0.5685,0.5137,0.5484,0.99,0.8008,0.99,0.3725,0.5407,0.3537,0.8457,1.171,1.159,1.15,3.039,1.583,3.039,1.161,0.5577,0.263,0.99,0.99,0.6809,0.5528,0.04269,0.99,0.556,0.5999,0.99,0.99,0.5462,0.9097,0.99,0.99,0.5473,0.119,0.1881,0.99,0.5459,0.2259,0.2915,0.04308,0.04073,0.04171,0.2225,0.2155,0.04182,0.05321,0.6524,0.03931,0.4294,0.1137,0.7037,0.2596,0.99,0.2197,0.3227,0.2126,0.03971,0.05379,0.99,0.1477,0.06132,0.2337,0.0435,0.2333,0.06058,0.0435,0.2143,0.5516,0.04207,0.9419,0.1714,0.04429,0.4851,0.6054,0.2181,0.2143,0.03971,0.03966,0.06224,0.07569,2.678,0.5106,0.04069,0.1948,0.1847,0.1688,0.559,0.07251,0.1696,0.2138,0.04003,0.03969,0.05336,0.04376,0.06058,0.4776,0.04291,0.04014,0.0435,0.04308,0.1134,0.99,0.2425,0.5417,0.99,0.99,1.307,0.5206,0.99,0.9854,0.2157,2.504,0.99,0.06163,0.1195,0.5488,0.9304,0.5427,0.05335,0.2339,0.5494,3.022,0.06257,3.039,1.216,1.046,3.039,0.2998,0.7262,1.089,1.207,2.675,1.159,3.039,0.99,0.7713,0.5524,0.04002,0.99,0.99,0.06131,2.974,3.039,3.039,3.039,0.5431,0.2144,0.5527,0.3606,0.99,2.591,3.039,3.039,1.158,3.039,3.039,1.158,3.039,2.901,3.039,3.039,3.039,3.039,0.99,3.039,1.386,0.04202,3.039,3.039,2.78,0.99,3.039,3.039,3.039,2.991,3.039,3.039,3.039,3.039,0.5517,2.955,1.334,0.6013,0.1738,0.5389,0.4991,0.5144,0.99,0.09644,0.99,0.5491,0.153,0.551,0.7958,0.5469,0.7794,0.8449,0.1824,0.04194,0.04377,0.1119,0.06323,0.2614,0.2276,0.04177,0.2142,0.2727,0.03971,0.04001,0.04308,0.0394,0.0435,0.5538,0.03931,0.04037,0.1692,0.1688,0.03965,0.2198,0.06486,0.04194,0.2642,0.99,3.038,0.99,0.99,0.5866,0.05337,2.144,0.1898,0.3337,0.03928,0.0435,0.99,0.04003,3.039,3.039,0.99,0.1208,3.038,0.2706,0.2156,0.8271,0.99,2.91,0.99,3.039,0.5306,2.886,3.039,3.039,0.06058,3.013,0.3691,3.039,3.039,0.5481,0.5989,0.99,3.039,1.553,0.2141,0.99,1.158,3.036,3.039,3.039,3.039,3.035,1.167,1.141,1.068,0.4067,3.039,0.3418,3.039,0.2645,0.99,3.039,0.5405,0.2511,0.03931,0.519,0.99,0.2137,0.99,0.99,0.5485,0.2471,2.221,0.3347,0.99,0.2822,3.039,3.039,0.1162,0.99,3.039,0.543,3.039,3.039,0.99,1.519,0.99,0.99,0.2741,0.05327,0.2384,0.6594,0.99,0.5473,1.505,3.039,0.2207,0.3301,0.5408,0.1829,0.1823,0.0435,0.99,0.04287,0.99,0.99,0.6038,0.231,0.549,0.5025,0.5531,0.7077,1.16,0.06118,0.5653,0.03987,0.99,0.04003,0.03966,0.05659,0.2348,0.99,0.99,0.2179,0.4566,0.99,0.99,0.5503,1.332,0.99,0.04184,0.99,0.99,0.0974,0.0774,0.5494,0.149,0.06059,0.9963,0.4374,0.99,0.5573,0.99,0.99,0.5171,0.1731,0.6019,0.1271,0.1899,0.4779,0.06078,2.505,0.04357,0.5493,0.2232,0.09711,0.8307,0.5252,0.2161,0.1727,0.2146,0.5931,0.99,0.99,0.99,0.99,0.99,0.99,0.99,0.0588,0.09564,0.99,2.549,0.0435,0.2404,0.99,0.99,0.99,0.06035,0.3945,0.99,0.1394,3.039,1.401,0.4322,0.1759,0.5168,0.05875,0.06304,0.06055,0.1889,0.561,0.2046,0.09928,0.2123,0.5073,0.356,0.6875,0.99,0.99,0.5455,0.6037,0.06699,0.2112,0.5534,0.1122,0.3327,0.5486,0.2182,0.03997,0.2246,0.3811,0.5301,0.1921,0.5463,0.99,0.99,0.3126,0.99,0.2155,0.9161,0.03924,0.1813,0.99,0.5563,0.616,0.99,0.3253,3.035,3.039,0.0435,0.99,0.2093,0.5519,0.99,0.444,0.99,0.99,0.9373,1.156,2.055,2.06,0.3955,1.54,1.848,1.28,0.5478,2.168,1.017,3.035,1.159,0.2392,0.99,0.99,0.4294,0.4369,0.99,0.99,2.094,0.2199,0.4732,0.2094,0.99,0.99,0.06301,0.99,0.2438,0.2148,0.5628,0.5431,0.99,0.6839,0.0435,0.03966,0.04025,0.4476,0.2413,0.06027,0.03971,0.03946,0.0435,0.03931,0.04025,0.0435,0.2168,0.8125,0.2301,0.99,0.5676,0.99,0.4659,1.309,0.2185,0.04177,0.07003,0.04194,0.99,0.99,0.99,0.2714,0.0435,0.5473,0.6011,0.6104,0.4011,0.5713,0.99,0.1116,0.2154,0.09574,0.2328,0.06055,0.1857,0.04194,0.07675,0.03971,0.0394,0.03931,0.99,0.0435,0.03965,0.5735,0.6267,0.04003,0.99,0.2873,0.2772,0.1851,3.038,0.2353,0.6178,3.039,3.039,0.99,0.8079,3.039,3.039,1.167,0.99,0.5453,0.2134,0.2304,0.04377,0.5343,0.1828,0.5623,3.039,0.99,3.039,1.711,0.7363,3.039,3.039,3.039,1.112,3.039,3.039,0.5448,3.034,3.038,3.039,3.039,1.163,0.3542,0.2475,3.025,3.039,0.112,3.037,0.1668,0.06054,0.831,0.213,0.0435,0.6329,2.99,0.6154,0.99,0.99,3.039,0.5973,0.5412,0.2146,0.0435,0.99,0.7067,0.3713,0.6892,0.7219,0.04025,0.04308,0.99,0.03946,0.4827,0.04402,0.5245,0.5212,0.04025,0.546,0.0407,0.2084,0.03971,0.2155,0.538,0.0435,0.2065,0.04464,0.04071,0.1056,0.3105,0.1704,0.05248,0.03965,0.04194,0.1088,0.06044,0.0435,0.1886,0.2143,0.2045,0.2884,0.0435,0.0435,0.03965,0.03971,0.3644,0.0435,0.04003,0.0394,0.04003,0.06739,0.06681,0.04002,0.3911,0.5214,0.119,0.3087,0.0435,0.0614,0.5458,0.99,0.99,0.04308,0.4963,0.04003,0.99,0.05856,0.03928,0.5463,0.04025,0.03924,0.03966,0.165,0.5626,3.039,0.0435,0.03971,0.99,0.99,0.99,0.1329,0.5707,0.9673,0.1874,0.5095,0.5418,0.2212,3.038,0.99,3.014,0.99,2.659,0.99,0.5462,0.99,0.04194,0.06152,0.04073,0.188,0.5508,0.04022,0.1774,0.99,0.504,0.06171,0.6374,0.6245,0.548,0.05873,1.308,0.3563,0.99,0.99,2.757,1.159,3.039,3.039,3.039,3.036,2.9,2.479,2.423,2.733,2.005,2.737,2.599,2.372,2.866,1.906,2.553,2.939,2.96,2.971,2.886,2.735,2.742,2.778,2.943,2.968,2.675,2.778,2.975,2.94,2.922,2.847,2.551,2.979,1.444,3.031,3.013,2.867,2.758,2.914,2.941,2.46,1.5,3.025,3.031,3.035,3.037,2.963,3.033,3.037,3.038,3.032,3.038,3.039,3.039,3.038,3.039,3.039,3.039,3.038,3.039,3.039,3.039,3.039,3.039,3.039,3.039,3.039,3.039,3.039,3.039,3.039,3.039]

TheInsertThreshold = 0.001
TheDeleteThreshold = 0.001
TheInsFunc = [.4,.3,.1,.01,.01,.01,.01]
TheDelFunc = [.4,.3,.1,.01,.01,.01,.01]

ThePAMMatrix = [[9867.0,   2.0,   9.0,  10.0,   3.0,   8.0,  17.0,  21.0,   2.0,   6.0,   4.0,   2.0,   6.0,   2.0,  22.0,  35.0,  32.0,   0.0,   2.0,  18.0],
                [   1.0,9913.0,   1.0,   0.0,   1.0,  10.0,   0.0,   0.0,  10.0,   3.0,   1.0,  19.0,   4.0,   1.0,   4.0,   6.0,   1.0,   8.0,   0.0,   1.0],
                [   4.0,   1.0,9822.0,  36.0,   0.0,   4.0,   6.0,   6.0,  21.0,   3.0,   1.0,  13.0,   0.0,   1.0,   2.0,  20.0,   9.0,   1.0,   4.0,   1.0],
                [   6.0,   0.0,  42.0,9859.0,   0.0,   6.0,  53.0,   6.0,   4.0,   1.0,   0.0,   3.0,   0.0,   0.0,   1.0,   5.0,   3.0,   0.0,   0.0,   1.0],
                [   1.0,   1.0,   0.0,   0.0,9973.0,   0.0,   0.0,   0.0,   1.0,   1.0,   0.0,   0.0,   0.0,   0.0,   1.0,   5.0,   1.0,   0.0,   3.0,   2.0],
                [   3.0,   9.0,   4.0,   5.0,   0.0,9876.0,  27.0,   1.0,  23.0,   1.0,   3.0,   6.0,   4.0,   0.0,   6.0,   2.0,   2.0,   0.0,   0.0,   1.0],
                [  10.0,   0.0,   7.0,  56.0,   0.0,  35.0,9865.0,   4.0,   2.0,   3.0,   1.0,   4.0,   1.0,   0.0,   3.0,   4.0,   2.0,   0.0,   1.0,   2.0],
                [  21.0,   1.0,  12.0,  11.0,   1.0,   3.0,   7.0,9935.0,   1.0,   0.0,   1.0,   2.0,   1.0,   1.0,   3.0,  21.0,   3.0,   0.0,   0.0,   5.0],
                [   1.0,   8.0,  18.0,   3.0,   1.0,  20.0,   1.0,   0.0,9912.0,   0.0,   1.0,   1.0,   0.0,   2.0,   3.0,   1.0,   1.0,   1.0,   4.0,   1.0],
                [   2.0,   2.0,   3.0,   1.0,   2.0,   1.0,   2.0,   0.0,   0.0,9872.0,   9.0,   2.0,  12.0,   7.0,   0.0,   1.0,   7.0,   0.0,   1.0,  33.0],
                [   3.0,   1.0,   3.0,   0.0,   0.0,   6.0,   1.0,   1.0,   4.0,  22.0,9947.0,   2.0,  45.0,  13.0,   3.0,   1.0,   3.0,   4.0,   2.0,  15.0],
                [   2.0,  37.0,  25.0,   6.0,   0.0,  12.0,   7.0,   2.0,   2.0,   4.0,   1.0,9926.0,  20.0,   0.0,   3.0,   8.0,  11.0,   0.0,   1.0,   1.0],
                [   1.0,   1.0,   0.0,   0.0,   0.0,   2.0,   0.0,   0.0,   0.0,   5.0,   8.0,   4.0,9874.0,   1.0,   0.0,   1.0,   2.0,   0.0,   0.0,   4.0],
                [   1.0,   1.0,   1.0,   0.0,   0.0,   0.0,   0.0,   1.0,   2.0,   8.0,   6.0,   0.0,   4.0,9946.0,   0.0,   2.0,   1.0,   3.0,  28.0,   0.0],
                [  13.0,   5.0,   2.0,   1.0,   1.0,   8.0,   3.0,   2.0,   5.0,   1.0,   2.0,   2.0,   1.0,   1.0,9926.0,  12.0,   4.0,   0.0,   0.0,   2.0],
                [  28.0,  11.0,  34.0,   7.0,  11.0,   4.0,   6.0,  16.0,   2.0,   2.0,   1.0,   7.0,   4.0,   3.0,  17.0,9840.0,  38.0,   5.0,   2.0,   2.0],
                [  22.0,   2.0,  13.0,   4.0,   1.0,   3.0,   2.0,   2.0,   1.0,  11.0,   2.0,   8.0,   6.0,   1.0,   5.0,  32.0,9871.0,   0.0,   2.0,   9.0],
                [   0.0,   2.0,   0.0,   0.0,   0.0,   0.0,   0.0,   0.0,   0.0,   0.0,   0.0,   0.0,   0.0,   1.0,   0.0,   1.0,   0.0,9976.0,   1.0,   0.0],
                [   1.0,   0.0,   3.0,   0.0,   3.0,   0.0,   1.0,   0.0,   4.0,   1.0,   1.0,   0.0,   0.0,  21.0,   0.0,   1.0,   1.0,   2.0,9945.0,   1.0],
                [  13.0,   2.0,   1.0,   1.0,   3.0,   2.0,   2.0,   3.0,   3.0,  57.0,  11.0,   1.0,  17.0,   1.0,   3.0,   2.0,  10.0,   0.0,   2.0,9901.0]]


# This is the rose control file for smpB 
SequenceLen = 156
SequenceNum = 100
OutputFilebase = "smpB"
InputType = 20 /* PROTEIN */
TheAlphabet = "ARNDCQEGHILKMFPSTWYV"
TheFreq = [0.0727330779054917,0.088250319284802,0.0486590038314176,0.0412515964240102,0.00555555555555556,0.0295019157088123,0.0783524904214559,0.0594508301404853,0.0284802043422733,0.0694763729246488,0.102107279693487,0.1272030651341,0.0204342273307791,0.0303959131545338,0.0215836526181354,0.0431034482758621,0.0335249042145594,0.00855683269476373,0.0386973180076628,0.0526819923371648]
TheTree = (((((((((((((((((n0:21,n1:21):9,n2:24):34,(n3:22,n4:27):2):2,n5:25):1,((n6:25,n7:27):4,n8:31):2):1,(n9:27,n10:22):1):4,(n11:30,n12:23):11):14,((((((n13:25,n14:27):1,n15:26):2,n16:28):2,n17:28):7,(((n18:28,n19:20):13,((n20:25,n21:31):10,n22:50):12):4,n23:39):4):6,n24:24):4):6,((((((n25:26,n26:36):3,n27:26):3,n28:24):2,n29:27):2,(((n30:24,n31:23):4,n32:23):4,n33:35):3):3,n34:36):2):2,n35:37):2,((((n36:22,n37:21):1,n38:27):32,n39:35):3,n40:48):2):1,((((((n41:27,n42:52):4,n43:24):2,n44:26):14,n45:34):4,n46:42):10,((((n47:28,n48:32):4,n49:30):7,n50:49):5,(n51:23,n52:24):25):3):3):1,(((n53:35,n54:36):11,n55:37):4,n56:40):7):2,((((((n57:31,(((n58:26,n59:20):3,n60:27):2,n61:23):3):18,((n62:32,n63:26):4,(n64:21,n65:31):9):17):4,n66:32):7,n67:44):8,n68:42):6,(((((n69:24,n70:24):2,n71:21):1,(n72:23,n73:22):2):1,(((n74:30,n75:25):5,n76:22):34,(((n77:22,n78:23):2,n79:35):2,n80:22):4):1):4,(((((((((n81:20,n82:33):1,n83:24):4,n84:25):3,n85:24):2,n86:34):8,n87:31):6,n88:35):2,(n89:27,n90:25):7):6,(((n91:23,n92:24):4,n93:37):6,n94:69):2):2):2):1):2,n95:38):3,(n96:26,n97:25):17):10,(n98:23,n99:22):10);

TheSequence = "MNVKKNKTTGLVIRNKQASFEYTFIDKFIAGIVLTGTEIKSIRKAKVSLQEAYCYFKSGELWIKSMHIAQYEQGNIYNHVENRERKLLLTRKELNKLIKNQEKGLTIIPIQLFIDENNRAKLQIALAKGKKLYDKRQHIKERDVQRDMERHQTAKF"
TheMutationProbability = [0.02842,1.836,3.228,2.403,4.315,3.643,4.309,4.316,4.316,4.318,4.303,1.152,0.9384,2.883,0.01641,0.5924,0.8924,0.2206,2.221,0.99,0.99,0.5097,1.923,0.6084,2.262,0.99,1.368,2.381,0.4015,0.2705,0.02684,0.6946,0.99,0.02591,2.376,0.05436,0.5193,0.01979,0.2527,0.09275,0.1851,1.304,0.3049,2.071,1.484,1.705,0.9026,0.9456,0.7268,2.323,0.8004,0.8294,0.99,0.924,3.189,1.323,2.262,1.641,0.99,0.2385,1.881,2.463,0.6776,4.318,0.5293,1.809,0.9784,0.1787,0.99,1.658,0.4323,3.542,2.367,0.9849,1.296,2.334,3.082,0.8358,0.7739,1.489,0.99,3.194,0.2425,2.533,0.1506,0.1615,0.02591,0.02591,0.6405,0.5141,0.9379,1.826,0.4083,0.4193,2.588,1.371,0.7293,4.315,1.855,2.337,2.026,2.287,1.864,0.3881,2.441,0.4666,0.9824,0.3985,0.31,0.9049,1.933,0.99,0.5345,1.398,0.525,1.665,1.699,0.9545,2.357,0.9568,0.02048,0.99,0.99,0.7583,0.725,0.99,0.5274,0.9204,0.1962,0.2734,0.8083,2.505,1.628,0.05646,0.1159,0.03328,1.721,1.8,0.99,0.5691,2.273,0.9427,0.99,2.463,2.619,0.4144,0.99,1.596,2.426,0.7603,2.901,2.042,0.9943,3.699,2.587,3.829]

TheInsertThreshold = 0.001
TheDeleteThreshold = 0.001
TheInsFunc = [.4,.3,.1,.01,.01,.01,.01]
TheDelFunc = [.4,.3,.1,.01,.01,.01,.01]

ThePAMMatrix = [[9867.0,   2.0,   9.0,  10.0,   3.0,   8.0,  17.0,  21.0,   2.0,   6.0,   4.0,   2.0,   6.0,   2.0,  22.0,  35.0,  32.0,   0.0,   2.0,  18.0],
                [   1.0,9913.0,   1.0,   0.0,   1.0,  10.0,   0.0,   0.0,  10.0,   3.0,   1.0,  19.0,   4.0,   1.0,   4.0,   6.0,   1.0,   8.0,   0.0,   1.0],
                [   4.0,   1.0,9822.0,  36.0,   0.0,   4.0,   6.0,   6.0,  21.0,   3.0,   1.0,  13.0,   0.0,   1.0,   2.0,  20.0,   9.0,   1.0,   4.0,   1.0],
                [   6.0,   0.0,  42.0,9859.0,   0.0,   6.0,  53.0,   6.0,   4.0,   1.0,   0.0,   3.0,   0.0,   0.0,   1.0,   5.0,   3.0,   0.0,   0.0,   1.0],
                [   1.0,   1.0,   0.0,   0.0,9973.0,   0.0,   0.0,   0.0,   1.0,   1.0,   0.0,   0.0,   0.0,   0.0,   1.0,   5.0,   1.0,   0.0,   3.0,   2.0],
                [   3.0,   9.0,   4.0,   5.0,   0.0,9876.0,  27.0,   1.0,  23.0,   1.0,   3.0,   6.0,   4.0,   0.0,   6.0,   2.0,   2.0,   0.0,   0.0,   1.0],
                [  10.0,   0.0,   7.0,  56.0,   0.0,  35.0,9865.0,   4.0,   2.0,   3.0,   1.0,   4.0,   1.0,   0.0,   3.0,   4.0,   2.0,   0.0,   1.0,   2.0],
                [  21.0,   1.0,  12.0,  11.0,   1.0,   3.0,   7.0,9935.0,   1.0,   0.0,   1.0,   2.0,   1.0,   1.0,   3.0,  21.0,   3.0,   0.0,   0.0,   5.0],
                [   1.0,   8.0,  18.0,   3.0,   1.0,  20.0,   1.0,   0.0,9912.0,   0.0,   1.0,   1.0,   0.0,   2.0,   3.0,   1.0,   1.0,   1.0,   4.0,   1.0],
                [   2.0,   2.0,   3.0,   1.0,   2.0,   1.0,   2.0,   0.0,   0.0,9872.0,   9.0,   2.0,  12.0,   7.0,   0.0,   1.0,   7.0,   0.0,   1.0,  33.0],
                [   3.0,   1.0,   3.0,   0.0,   0.0,   6.0,   1.0,   1.0,   4.0,  22.0,9947.0,   2.0,  45.0,  13.0,   3.0,   1.0,   3.0,   4.0,   2.0,  15.0],
                [   2.0,  37.0,  25.0,   6.0,   0.0,  12.0,   7.0,   2.0,   2.0,   4.0,   1.0,9926.0,  20.0,   0.0,   3.0,   8.0,  11.0,   0.0,   1.0,   1.0],
                [   1.0,   1.0,   0.0,   0.0,   0.0,   2.0,   0.0,   0.0,   0.0,   5.0,   8.0,   4.0,9874.0,   1.0,   0.0,   1.0,   2.0,   0.0,   0.0,   4.0],
                [   1.0,   1.0,   1.0,   0.0,   0.0,   0.0,   0.0,   1.0,   2.0,   8.0,   6.0,   0.0,   4.0,9946.0,   0.0,   2.0,   1.0,   3.0,  28.0,   0.0],
                [  13.0,   5.0,   2.0,   1.0,   1.0,   8.0,   3.0,   2.0,   5.0,   1.0,   2.0,   2.0,   1.0,   1.0,9926.0,  12.0,   4.0,   0.0,   0.0,   2.0],
                [  28.0,  11.0,  34.0,   7.0,  11.0,   4.0,   6.0,  16.0,   2.0,   2.0,   1.0,   7.0,   4.0,   3.0,  17.0,9840.0,  38.0,   5.0,   2.0,   2.0],
                [  22.0,   2.0,  13.0,   4.0,   1.0,   3.0,   2.0,   2.0,   1.0,  11.0,   2.0,   8.0,   6.0,   1.0,   5.0,  32.0,9871.0,   0.0,   2.0,   9.0],
                [   0.0,   2.0,   0.0,   0.0,   0.0,   0.0,   0.0,   0.0,   0.0,   0.0,   0.0,   0.0,   0.0,   1.0,   0.0,   1.0,   0.0,9976.0,   1.0,   0.0],
                [   1.0,   0.0,   3.0,   0.0,   3.0,   0.0,   1.0,   0.0,   4.0,   1.0,   1.0,   0.0,   0.0,  21.0,   0.0,   1.0,   1.0,   2.0,9945.0,   1.0],
                [  13.0,   2.0,   1.0,   1.0,   3.0,   2.0,   2.0,   3.0,   3.0,  57.0,  11.0,   1.0,  17.0,   1.0,   3.0,   2.0,  10.0,   0.0,   2.0,9901.0]]


# This is the rose control file for tsf 
SequenceLen = 288
SequenceNum = 100
OutputFilebase = "tsf"
InputType = 20 /* PROTEIN */
TheAlphabet = "ARNDCQEGHILKMFPSTWYV"
TheFreq = [0.120607537971123,0.043615225951622,0.0408775548471779,0.0575660978811176,0.0102756422276392,0.0341646352897056,0.102081380086255,0.066566660416276,0.0119632477029814,0.0671291955747234,0.0798049878117382,0.0966810425651603,0.0270766922932683,0.0332270766922933,0.0192762047627977,0.0463903993999625,0.0420026251640728,0.00243765235327208,0.0148884305269079,0.0833677104819051]
TheTree = (((((((((((((((((n0:21,n1:21):9,n2:24):34,(n3:22,n4:27):2):2,n5:25):1,((n6:25,n7:27):4,n8:31):2):1,(n9:27,n10:22):1):4,(n11:30,n12:23):11):14,((((((n13:25,n14:27):1,n15:26):2,n16:28):2,n17:28):7,(((n18:28,n19:20):13,((n20:25,n21:31):10,n22:50):12):4,n23:39):4):6,n24:24):4):6,((((((n25:26,n26:36):3,n27:26):3,n28:24):2,n29:27):2,(((n30:24,n31:23):4,n32:23):4,n33:35):3):3,n34:36):2):2,n35:37):2,((((n36:22,n37:21):1,n38:27):32,n39:35):3,n40:48):2):1,((((((n41:27,n42:52):4,n43:24):2,n44:26):14,n45:34):4,n46:42):10,((((n47:28,n48:32):4,n49:30):7,n50:49):5,(n51:23,n52:24):25):3):3):1,(((n53:35,n54:36):11,n55:37):4,n56:40):7):2,((((((n57:31,(((n58:26,n59:20):3,n60:27):2,n61:23):3):18,((n62:32,n63:26):4,(n64:21,n65:31):9):17):4,n66:32):7,n67:44):8,n68:42):6,(((((n69:24,n70:24):2,n71:21):1,(n72:23,n73:22):2):1,(((n74:30,n75:25):5,n76:22):34,(((n77:22,n78:23):2,n79:35):2,n80:22):4):1):4,(((((((((n81:20,n82:33):1,n83:24):4,n84:25):3,n85:24):2,n86:34):8,n87:31):6,n88:35):2,(n89:27,n90:25):7):6,(((n91:23,n92:24):4,n93:37):6,n94:69):2):2):2):1):2,n95:38):3,(n96:26,n97:25):17):10,(n98:23,n99:22):10);

TheSequence = "MAQITAAMVKELREMTGAGMMECKKALTEADGNLDAAVDILRTRGLAAAAKKAGRATNEGRVVALVEGKAGAVCQVNCETDFVALTDKFQAYAEGFTKAVLANDPADVEALLASEYEGAKVQDELTEAIHVIGENMQISSFKRLAIEGTGALVPYIHMNGKIGVLVAFRFANDATADDERFLTMGKDVAMQIAATNPVSLDESSVPADVRNHEMEIYKAQAAESGKPESIQEKIASGRMQKFYKENCLVDQDFVKDSDKSVAQYVAGVAKEIGDTIEVADFARIALGD"
TheMutationProbability = [0.05296,0.9629,2.122,0.9286,0.944,0.7222,1.807,1.7,0.3949,0.3558,0.99,0.09112,0.05481,0.99,2.125,0.1695,0.6679,0.4407,0.43,0.5357,0.616,0.3893,0.5206,0.1964,0.8326,0.05579,0.06814,2.142,0.715,0.99,1.889,0.322,0.4045,1.648,0.99,0.99,0.06227,1.349,1.668,3.478,0.2854,0.3143,1.394,0.8707,0.1694,1.799,0.8455,1.424,0.3196,0.994,0.3237,0.2871,0.9248,1.737,0.3152,1.615,0.5318,0.99,0.2896,0.05786,2.462,0.7047,2.546,0.99,3.471,1.834,1.583,1.962,1.589,2.763,0.9834,0.9315,1.391,1.314,0.2292,0.9154,0.461,0.6739,0.1111,0.05893,0.0546,0.07196,0.1063,0.1962,0.9744,0.5328,1.509,2.835,0.1714,2.371,2.657,1.216,0.9202,2.045,3.455,1.303,1.363,2.723,3.479,1.213,1.697,3.353,1.919,2.292,2.315,2.079,1.35,2.149,1.205,1.793,1.649,3.436,1.667,2.141,3.402,3.399,1.75,1.324,3.441,0.9031,0.822,1.8,1.485,3.426,1.321,2.487,2.159,2.579,0.883,0.7242,1.269,0.6631,0.3504,0.05487,0.4066,0.6156,2.231,1.039,0.6884,0.5125,2.379,2.52,3.206,2.939,2.275,1.932,3.362,2.814,2.217,1.457,3.455,1.107,2.192,1.54,0.08587,1.302,0.05278,2.011,1.115,1.158,0.7903,0.5708,0.7801,0.3287,1.211,0.8525,2.01,2.079,2.16,1.92,2.128,1.829,3.438,1.844,1.723,1.27,2.209,1.566,3.055,2.629,1.705,3.13,2.47,1.931,0.9387,0.99,0.99,0.99,0.3397,0.3327,0.399,0.733,0.1963,0.222,1.879,1.338,0.1818,3.413,1.94,1.314,1.479,2.883,1.928,2.113,0.678,0.9737,1.9,1.72,2.726,1.574,1.635,1.666,0.2494,1.155,2.011,0.7545,3.429,3.394,1.715,0.99,1.067,2.159,2.124,1.66,0.8856,0.05782,0.4977,0.9857,2.167,0.9243,1.989,0.9928,0.6086,0.2822,0.9589,1.54,0.09648,0.99,1.335,2.292,0.4553,1.579,2.12,2.22,0.5715,1.933,1.1,0.1267,1.37,1.704,0.05203,2.924,0.99,0.7442,0.9717,0.6759,2.031,1.842,2.248,0.7702,0.6483,3.464,2.019,2.045,1.355,1.989,1.92,2.49,2.168,1.391,1.164,2.243,0.47,1.486,1.297,0.7076,2.933,0.8431,2.086,1.694,0.6357,1.558,0.3744,1.787,1.433,0.9451,0.1355,0.8044]

TheInsertThreshold = 0.001
TheDeleteThreshold = 0.001
TheInsFunc = [.4,.3,.1,.01,.01,.01,.01]
TheDelFunc = [.4,.3,.1,.01,.01,.01,.01]

ThePAMMatrix = [[9867.0,   2.0,   9.0,  10.0,   3.0,   8.0,  17.0,  21.0,   2.0,   6.0,   4.0,   2.0,   6.0,   2.0,  22.0,  35.0,  32.0,   0.0,   2.0,  18.0],
                [   1.0,9913.0,   1.0,   0.0,   1.0,  10.0,   0.0,   0.0,  10.0,   3.0,   1.0,  19.0,   4.0,   1.0,   4.0,   6.0,   1.0,   8.0,   0.0,   1.0],
                [   4.0,   1.0,9822.0,  36.0,   0.0,   4.0,   6.0,   6.0,  21.0,   3.0,   1.0,  13.0,   0.0,   1.0,   2.0,  20.0,   9.0,   1.0,   4.0,   1.0],
                [   6.0,   0.0,  42.0,9859.0,   0.0,   6.0,  53.0,   6.0,   4.0,   1.0,   0.0,   3.0,   0.0,   0.0,   1.0,   5.0,   3.0,   0.0,   0.0,   1.0],
                [   1.0,   1.0,   0.0,   0.0,9973.0,   0.0,   0.0,   0.0,   1.0,   1.0,   0.0,   0.0,   0.0,   0.0,   1.0,   5.0,   1.0,   0.0,   3.0,   2.0],
                [   3.0,   9.0,   4.0,   5.0,   0.0,9876.0,  27.0,   1.0,  23.0,   1.0,   3.0,   6.0,   4.0,   0.0,   6.0,   2.0,   2.0,   0.0,   0.0,   1.0],
                [  10.0,   0.0,   7.0,  56.0,   0.0,  35.0,9865.0,   4.0,   2.0,   3.0,   1.0,   4.0,   1.0,   0.0,   3.0,   4.0,   2.0,   0.0,   1.0,   2.0],
                [  21.0,   1.0,  12.0,  11.0,   1.0,   3.0,   7.0,9935.0,   1.0,   0.0,   1.0,   2.0,   1.0,   1.0,   3.0,  21.0,   3.0,   0.0,   0.0,   5.0],
                [   1.0,   8.0,  18.0,   3.0,   1.0,  20.0,   1.0,   0.0,9912.0,   0.0,   1.0,   1.0,   0.0,   2.0,   3.0,   1.0,   1.0,   1.0,   4.0,   1.0],
                [   2.0,   2.0,   3.0,   1.0,   2.0,   1.0,   2.0,   0.0,   0.0,9872.0,   9.0,   2.0,  12.0,   7.0,   0.0,   1.0,   7.0,   0.0,   1.0,  33.0],
                [   3.0,   1.0,   3.0,   0.0,   0.0,   6.0,   1.0,   1.0,   4.0,  22.0,9947.0,   2.0,  45.0,  13.0,   3.0,   1.0,   3.0,   4.0,   2.0,  15.0],
                [   2.0,  37.0,  25.0,   6.0,   0.0,  12.0,   7.0,   2.0,   2.0,   4.0,   1.0,9926.0,  20.0,   0.0,   3.0,   8.0,  11.0,   0.0,   1.0,   1.0],
                [   1.0,   1.0,   0.0,   0.0,   0.0,   2.0,   0.0,   0.0,   0.0,   5.0,   8.0,   4.0,9874.0,   1.0,   0.0,   1.0,   2.0,   0.0,   0.0,   4.0],
                [   1.0,   1.0,   1.0,   0.0,   0.0,   0.0,   0.0,   1.0,   2.0,   8.0,   6.0,   0.0,   4.0,9946.0,   0.0,   2.0,   1.0,   3.0,  28.0,   0.0],
                [  13.0,   5.0,   2.0,   1.0,   1.0,   8.0,   3.0,   2.0,   5.0,   1.0,   2.0,   2.0,   1.0,   1.0,9926.0,  12.0,   4.0,   0.0,   0.0,   2.0],
                [  28.0,  11.0,  34.0,   7.0,  11.0,   4.0,   6.0,  16.0,   2.0,   2.0,   1.0,   7.0,   4.0,   3.0,  17.0,9840.0,  38.0,   5.0,   2.0,   2.0],
                [  22.0,   2.0,  13.0,   4.0,   1.0,   3.0,   2.0,   2.0,   1.0,  11.0,   2.0,   8.0,   6.0,   1.0,   5.0,  32.0,9871.0,   0.0,   2.0,   9.0],
                [   0.0,   2.0,   0.0,   0.0,   0.0,   0.0,   0.0,   0.0,   0.0,   0.0,   0.0,   0.0,   0.0,   1.0,   0.0,   1.0,   0.0,9976.0,   1.0,   0.0],
                [   1.0,   0.0,   3.0,   0.0,   3.0,   0.0,   1.0,   0.0,   4.0,   1.0,   1.0,   0.0,   0.0,  21.0,   0.0,   1.0,   1.0,   2.0,9945.0,   1.0],
                [  13.0,   2.0,   1.0,   1.0,   3.0,   2.0,   2.0,   3.0,   3.0,  57.0,  11.0,   1.0,  17.0,   1.0,   3.0,   2.0,  10.0,   0.0,   2.0,9901.0]]
